# Supplementary material for: Characterization of basal and lipopolysaccharide-induced microRNA expression in equine peripheral blood mononuclear cells using Next-Generation Sequencing
Source: PLoS One. 2017 May 26;12(5):e0177664. doi: 10.1371/journal.pone.0177664 (PMC5446123; doi:10.1371/journal.pone.0177664)
Supplement: S1 File — Details are provided of the time points, treatments, sample numbers and horse demographics for each stage of the analysis. (XLSX) [file pone.0177664.s002.xlsx]

## Sheet: Sheet1
		Illumina Sequencing	qRT-PCR	Cytokine ELISA
Number of samples per group
(Numbers in parentheses indicate final sample numbers after exclusions due to technical failure)
Time (hours)	Treatment
0	None	4	8	8
2	Control	4	8	8
2	LPS	4	8 (5)	8
4	Control	4	8 (5)	8
4	LPS	4	8 (6)	8
8	Control	N/A	8 (7)	8
8	LPS	N/A	8	8
Animal details
Sex		4 geldings	8 geldings	8 geldings
Median age		12 years	11 years	11 years
Age range		11 - 12 years	9 - 12 years	9 - 12 years
Breeds		2 Warmbloods, 1 Thoroughbred, 1 Thoroughbred cross	4 Warmbloods, 2 Thoroughbreds, 1 Thoroughbred cross, 1 Tennessee Walking Horse	4 Warmbloods, 2 Thoroughbreds, 1 Thoroughbred cross, 1 Tennessee Walking Horse
