# Supplementary material for: Characterization of basal and lipopolysaccharide-induced microRNA expression in equine peripheral blood mononuclear cells using Next-Generation Sequencing
Source: PLoS One. 2017 May 26;12(5):e0177664. doi: 10.1371/journal.pone.0177664 (PMC5446123; doi:10.1371/journal.pone.0177664)
Supplement: S2 File — A: Mature miRNAs, including sequences, loci on equine chromosomes and expression data. B: Screening of candidate endogenous controls for expression stability using Normfinder. (XLSX) [file pone.0177664.s003.xlsx]

## Sheet: A. miRNA expression
Annotation from miRBase ver. 21, Equine Genome Assembly Equ Cab 2.0
Expression given as normalized read counts						Baseline (Time 0)				Time: 2 hours								Time: 4 hours
										Control				LPS				Control				LPS
mature miRNA	Sequence	Chromosome	Start	End	Strand	Horse 1	Horse 2	Horse 3	Horse 4	Horse 1	Horse 2	Horse 3	Horse 4	Horse 1	Horse 2	Horse 3	Horse 4	Horse 1	Horse 2	Horse 3	Horse 4	Horse 1	Horse 2	Horse 3	Horse 4
eca-let-7a	UGAGGUAGUAGGUUGUAUAGUU	chr7	29543954	29543975	-	25263.9	29106.5	32041.4	29937.4	26283.3	30148.1	31219.6	32810.7	31845.6	31965.3	33785.1	24619	30080	29373.4	27074.4	29047.3	33264.2	31192.9	32552.3	23067.2
		chr28	42016391	42016412	+
eca-let-7c	UGAGGUAGUAGGUUGUAUGGUU	chr26	15509725	15509746	+	731.898	861.43	945.174	832.844	796.289	804.902	908	876.479	908.508	956.788	941.86	740.772	846.644	800.09	864.122	850.108	968.93	918.817	864.253	750.225
eca-let-7d	AGAGGUAGUAGGUUGCAUAGUU	chr23	54148876	54148897	-	6859.31	7090.04	8109.8	8928.69	6921.06	8064.17	8155.77	9326.3	7633.1	8365.21	8440.45	7020.25	7815.55	7504.96	7381.28	8147.84	8465.32	8326.4	8128.88	6580.47
eca-let-7e	UGAGGUAGGAGGUUGUAUAGUU	chr10	21371074	21371095	+	233.181	228.956	418.577	219.734	248.984	176.343	362.818	206.133	241.413	222.36	360.178	168.112	270.965	187.65	349.982	202.628	312.25	215.953	422.23	178.663
eca-let-7f	UGAGGUAGUAGAUUGUAUAGUU	chr23	54150817	54150838	-	63892.7	94133.7	85841.6	75432.9	68072.4	85315.3	83134.1	89544.3	87948	95540.9	95471.3	70768.9	81497.7	87888.2	66532.4	86902.8	93677.5	91198.2	87820.1	63539
eca-let-7g	UGAGGUAGUAGUUUGUACAGUU	chr16	35442186	35442207	+	148052	184602	192433	180671	152041	196825	189543	202250	201819	213522	236698	146812	190727	191458	159253	195399	222439	199433	208613	141022
eca-miR-1	UGGAAUGUAAAGAAGUAUGUAU	chr8	39912260	39912281	+	3.34709	5.05979	8.30923	7.5031	0	4.32743	9.54785	4.12267	4.66499	6.41422	8.37623	12.5859	2.89286	4.12417	9.99948	6.98719	5.95898	9.1678	7.53983	2.37163
		chr22	48433554	48433575	+
eca-miR-7	UGGAAGACUAGUGAUUUUGUUGU	chr1	94575000	94575022	-	4652.46	6203.31	6162.33	4622.98	5571.73	6585.27	5503.38	6115.56	7387.02	6686.83	6519.5	4512.95	7795.3	7610.13	4681.42	6236.45	8056.54	6692.49	6559.65	4507.67
		chr7	2932730	2932752	+
		chr23	6798843	6798865	-
eca-miR-9a	UCUUUGGUUAUCUAGCUGUAUGA	chr5	41824848	41824870	+	17.8512	36.6835	17.6571	19.2937	24.0952	21.6372	20.0505	24.736	25.6575	28.864	15.8218	34.1618	33.75	28.8692	14.1659	33.3832	21.4523	22.4102	23.562	41.1082
		chr14	78843156	78843178	+
eca-miR-10a	UACCCUGUAGAUCCGAAUUUGUG	chr11	24629558	24629580	-	5539.44	8611.77	4690.56	5951.03	5716.3	5320.58	5205.49	8895.07	7080.3	7613.68	4901.96	8758.91	5717.26	6178.01	5142.23	9079.46	6622.81	6851.4	6308.01	7382.08
eca-miR-10b	UACCCUGUAGAACCGAAUUUGUG	chr18	54609743	54609765	+	34.5866	45.5381	54.01	39.6592	28.6848	38.9469	49.6488	64.3136	39.6525	44.8996	54.9108	76.4146	34.7143	32.9934	49.9974	67.5428	38.1374	30.5593	74.4558	49.0136
eca-miR-15a	UAGCAGCACAUAAUGGUUUGUG	chr17	21138783	21138804	+	483.097	414.903	603.458	555.229	398.145	521.456	464.025	510.386	307.89	383.784	508.158	551.983	431.036	455.721	504.14	470.471	353.963	414.588	516.478	501.994
eca-miR-15b	UAGCAGCACAUCAUGGUUUACA	chr5	15685192	15685213	+	1138.01	895.583	904.667	885.366	1072.81	950.953	1137.15	863.286	731.238	831.711	906.494	1025.75	827.358	826.897	973.283	826.041	755.598	890.295	797.337	972.367
eca-miR-16	UAGCAGCACGUAAAUAUUGGCG	chr5	15685339	15685360	+
		chr17	21138923	21138944	+	12610.7	13251.6	13097.4	12197.9	11574.9	12004.3	11841.2	10571.3	8904.31	11088.1	12301	12329.7	10052.7	11781.7	12749.3	10731.5	8931.31	10978.9	10930.9	11798.8
eca-miR-17	CAAAGUGCUUACAGUGCAGGUAG	chr17	61792416	61792438	+	1260.74	1004.37	1038.65	991.481	1387.2	979.082	1077.95	919.355	891.014	839.194	1090.77	1176.78	1065.54	904.225	1132.44	1081.46	964.162	806.766	894.412	1087.79
eca-miR-18a	UAAGGUGCAUCUAGUGCAGAUAG	chr17	61792556	61792578	+	161.776	103.726	142.295	126.481	126.213	99.5309	124.122	118.733	97.9649	85.523	120.059	172.607	127.286	107.229	134.993	150.613	84.6175	91.678	98.9602	173.919
eca-miR-18b	UAAGGUGCAUCUAGUGCAGUUAG	chrX	106692587	106692609	-	2.2314	11.3845	14.5411	6.43123	3.44217	9.73672	5.72871	5.77173	1.16625	6.41422	4.65346	11.6869	9.64287	8.24835	4.16645	10.0926	0	6.11186	3.76991	11.0676
eca-miR-19a	UGUGCAAAUCUAUGCAAAACUGA	chr17	61792740	61792762	+	136.115	84.7515	164.107	116.834	129.655	170.934	124.122	110.487	122.456	115.456	192.653	115.071	158.143	138.16	76.6627	116.453	98.919	89.6407	126.292	128.858
eca-miR-19b	UGUGCAAAUCCAUGCAAAACUGA	chr17	61793043	61793065	+	1247.35	1089.12	1484.24	1029	1282.78	1393.43	1223.08	1050.46	994.81	1054.07	1576.59	1017.66	1393.39	1349.64	1048.28	1124.16	965.354	994.197	1197.89	1068.02
		chrX	106692185	106692207	-
eca-miR-20a	UAAAGUGCUUAUAGUGCAGGUAG	chr17	61792870	61792892	+	4312.17	3386.27	3158.54	3326.02	4151.26	3103.85	3798.13	2962.55	2845.65	2814.77	3542.21	3845	3555.33	2783.82	4045.62	3513.78	3115.35	2857.3	3086.62	3864.96
eca-miR-20b	CAAAGUGCUCAUAGUGCAGGUAG	chrX	106692352	106692374	-	320.205	234.015	289.784	337.639	324.712	223.945	344.677	264.675	216.922	174.253	285.722	307.456	252.643	205.178	345.815	277.159	174.002	227.158	245.044	328.075
eca-miR-21	UAGCUUAUCAGACUGAUGUUGA	chr11	33863752	33863773	+	742587	728528	667424	616131	832334	764080	783154	715736	866166	699158	795735	911081	994178	939679	792982	891528	868623	772854	742114	912520
eca-miR-22	AAGCUGCCAGUUGAAGAACUGU	chr11	45377856	45377877	-	13467.6	14746.8	18239.8	18595.9	13492.2	15108.1	15362.5	20455.8	12778.6	16888.6	16838.1	15188.5	15216.4	16896.7	17122.4	18460.2	14448.1	18087	19003.2	14814
eca-miR-23a	AUCACAUUGCCAGGGAUUUCC	chr7	44929861	44929881	+	7596.79	7389.83	8077.61	6842.83	7812.58	8055.52	10285.9	8096.09	6894.86	8975.63	9610.33	8658.22	7274.58	7507.03	10192.8	7549.27	7774.08	7987.19	9095.86	8746.56
eca-miR-23b	AUCACAUUGCCAGGGAUUACC	chr23	2317932	2317952	-	2329.58	2522.31	2750.35	2309.88	2532.29	2501.26	2546.41	2566.77	2449.12	2718.56	2678.53	2474.03	2349.97	2488.94	2592.36	2390.4	2496.81	2380.57	2610.67	2430.92
eca-miR-24	UGGCUCAGUUCAGCAGGAACAG	chr7	44930206	44930227	+	33006.8	25611.4	31977	37957.1	38285	27862.2	40697.7	39511.6	32359.9	23498.5	41352.5	51529.5	30227.5	25956.5	41127.9	46416.7	28737.8	24706.2	33666.3	50385.2
		chr23	2317180	2317201	-
eca-miR-25	CAUUGCACUUGUCUCGGUCUGA	chr13	8034257	8034278	-	23096.1	23819	19017.7	19477	21436.7	17836.6	18213.5	17146.2	22204.2	20891.1	17138.7	20427.9	18931.8	17174.1	20154.8	17402	20653.8	19491.8	18617.7	17622.8
eca-miR-26a	UUCAAGUAAUCCAGGAUAGGCU	chr6	75354719	75354740	-	130554	149629	172732	169576	136177	173029	137234	187577	159418	159579	154638	133175	155800	169805	129278	172331	156318	159091	158850	134991
		chr16	47241059	47241080	-
eca-miR-27a	UUCACAGUGGCUAAGUUCCGC	chr7	44930064	44930084	+	48704.7	36939	52008.5	47481.8	44861.8	41262.1	56074.5	42221.9	44185.7	39208	55059.7	48964.7	44849	41543.8	61528.5	46769.1	41430.4	40965.8	54902.2	50311.7
eca-miR-27b	UUCACAGUGGCUAAGUUCUGC	chr23	2317700	2317720	-	32812.7	29780.7	27976.1	27667.1	31318	27684.7	33158.7	31463.4	34930.3	31901.1	35623.2	34906.2	29923.8	27547.4	33757.4	32214	34059.1	28836.8	32906.6	31900.7
eca-miR-28-3p	CACUAGAUUGUGAGCUCCUGGA	chr19	26408799	26408820	+	2682.14	2842.34	2349.43	2474.95	2733.08	1702.84	2599.88	2400.22	2765.18	1994.82	2210.39	3427.87	2187.97	1638.33	2640.7	2738.98	2613.61	1907.92	2547.52	2743.97
eca-miR-28-5p	AAGGAGCUCACAGUCUAUUGAG	chr19	26408759	26408780	+	1846.48	1224.47	1785.44	1549.93	2113.49	1468.08	2145.4	1986.3	1349.35	1121.42	1401.62	2393.12	1525.5	1369.23	2281.55	1907.5	1179.88	1214.22	1598.44	2470.44
eca-miR-29a	UAGCACCAUCUGAAAUCGGUUA	chr4	85326729	85326750	-	28846.4	28511.9	40758.8	32465.9	28893.6	32401.6	32578.2	33023.4	28428.5	29108.8	34787.4	27064.2	31470.5	30829.2	32610	29978.9	27902.3	29305.4	34299.6	29797.9
eca-miR-29b	UAGCACCAUUUGAAAUCAGUGUU	chr4	85327115	85327137	-	1859.87	1777.25	2195.71	2387.06	1475.54	1950.59	1751.08	1962.39	1266.55	1844.09	2066.14	1929.24	1649.89	2027.03	1868.24	1891.98	1507.62	1977.19	1894.38	1950.27
		chr5	30271210	30271232	+
eca-miR-29c	UAGCACCAUUUGAAAUCGGUUA	chr5	30271768	30271789	+	373.759	406.048	400.92	394.449	343.07	495.491	309.35	367.742	368.535	427.615	329.465	382.073	365.465	507.273	326.65	356.347	288.414	447.185	352.487	409.501
		chr5	30369060	30369081	+
eca-miR-30b	UGUAAACAUCCUACACUCAGCU	chr9	75208406	75208427	-	939.418	1288.98	1191.34	1025.78	862.838	1543.81	845.939	1047.98	846.696	1241.15	1220.14	782.125	1251.64	1467.17	729.962	945.6	924.833	1249.88	987.717	868.806
eca-miR-30c	UGUAAACAUCCUACACUCUCAGC	chr2	17432778	17432800	-	10608.1	10438.4	10113.4	9012.29	11104.4	11908	10659.2	8920.63	10672.3	10276.7	12452.7	8736.43	10976.5	9774.29	9730.33	8912.55	10494.9	9871.68	9647.21	8854.86
		chr20	62697786	62697808	-
eca-miR-30d	UGUAAACAUCCCCGACUGGAAG	chr9	75212740	75212761	-	34750.6	37200.9	30718.2	39085.8	40569.4	33306.1	32698.5	51389.9	41018.1	36732.1	30577.9	48256.2	38004.5	35231.8	32133.3	48699.9	37058.9	35059.7	32840.7	44585
eca-miR-30e	UGUAAACAUCCUUGACUGGAAG	chr2	17435704	17435725	-	11840.9	12332	15605.8	13309.4	12381.5	14747.9	11518.5	13487.7	12676	12592.2	14764.5	11348.9	13649.5	13672.7	10902.8	13975.9	11858.4	11622.7	12825.2	11911.1
eca-miR-31	AGGCAAGAUGCUGGCAUAGCU	chr23	40415262	40415282	-	558.965	884.199	1166.41	541.295	483.051	811.394	975.79	478.229	397.691	701.288	1023.76	456.689	466.715	756.786	979.949	492.985	426.663	745.647	992.43	452.19
eca-miR-32	UAUUGCACAUUACUAAGUUGCA	chr25	14424898	14424919	-	637.063	350.391	578.53	586.314	402.734	678.325	480.257	267.149	423.348	432.96	983.742	425.225	582.429	535.112	529.972	409.915	384.95	383.01	493.859	523.339
eca-miR-33a	GUGCAUUGUAGUUGCAUUGCA	chr28	38272572	38272592	+	18.9669	12.6495	24.9277	12.8625	13.7687	15.146	14.3218	9.8944	12.8287	10.6904	24.198	11.6869	13.5	17.5277	19.1657	10.0926	11.918	7.13051	21.677	14.2298
eca-miR-33b	GUGCAUUGCUGUUGCAUUGC	chr11	60069240	60069259	+	0	1.26495	0	0	1.14739	0	0.954785	0	0	0	0	0	2.89286	0	0	0	0	1.01864	0	0
eca-miR-34a	UGGCAGUGUCUUAGCUGGUUGU	chr2	41934533	41934554	+	49.0907	32.8887	24.9277	23.5812	18.3582	27.0465	24.8244	32.1568	17.4937	29.933	22.3366	24.2729	27.9643	23.714	24.9987	27.9488	26.2195	21.3915	19.792	30.0406
eca-miR-34b-3p	AAUCACUAACUCCACUGCCAUC	chr7	20101188	20101209	+	0	2.5299	0	0	0	0	0.954785	0	3.49875	0	0.930692	0.898995	0	1.03104	0.83329	0	0	1.01864	0	0.790542
eca-miR-34b-5p	AGGCAGUGUAAUUAGCUGAUUGU	chr7	20101151	20101173	+	1.1157	0	3.11596	1.07187	2.29478	2.16372	0.954785	1.64907	0	1.06904	0.930692	0	2.89286	0	1.66658	0	3.57539	2.03729	1.88496	0
eca-miR-34c	AGGCAGUGUAGUUAGCUGAUUGC	chr7	20101729	20101751	+	18.9669	24.034	19.7344	12.8625	13.7687	8.65486	23.8696	11.5435	13.995	6.41422	17.6832	8.09095	16.3929	7.2173	19.999	10.0926	23.8359	12.2237	16.0221	14.2298
eca-miR-92a	UAUUGCACUUGUCCCGGCCUGU	chr17	61793159	61793180	+	26293.7	33669.1	27010.2	27869.7	25341.3	28155.4	24035.8	28334.3	28884.5	38514.2	22817.8	24681.9	27353	29792	26600.3	24192	32292.9	35328.6	30047.2	22532
		chrX	106692048	106692069	-
eca-miR-92b	UAUUGCACUCGUCCCGGCCUCC	chr5	42707140	42707161	-	137.231	160.648	168.262	179.003	122.771	159.033	115.529	228.396	127.121	195.634	147.049	228.345	157.179	154.657	154.159	208.063	157.317	197.617	172.474	194.473
eca-miR-93	CAAAGUGCUGUUCGUGCAGGUAG	chr13	8034501	8034523	-	6849.27	5818.76	5812.3	5500.84	6970.4	5566.16	6043.79	5018.93	5273.78	5023.4	5567.4	5894.71	5806.94	5030.46	5694.7	5391	5414.33	4773.37	4893.35	5558.3
eca-miR-95	UUCAACGGGUCUUUAUUGAGCA	chr3	115690389	115690410	-	31.2395	50.5979	67.5125	10.7187	40.1587	38.9469	68.7445	6.59627	33.8212	45.9686	55.8415	4.49497	30.8572	56.7074	49.9974	3.88177	30.9867	47.8763	46.1814	9.48651
eca-miR-96	UUUGGCACUAGCACAUUUUUGCU	chr4	84471819	84471841	-	8.92558	5.05979	17.6571	7.5031	11.4739	18.3916	12.4122	14.8416	5.83124	6.41422	7.44554	11.6869	7.7143	4.12417	7.49961	5.43448	7.15077	8.14915	9.42478	7.11488
eca-miR-98	UGAGGUAGUAAGUUGUAUUGUU	chrX	44776555	44776576	+	2224.7	2379.37	2615.33	2919.78	2251.18	3327.8	2742.14	3349.25	2800.16	3221.01	3573.86	2234.9	2916	2862.18	2415.71	3014.58	3240.49	2993.79	2937.71	2302.85
eca-miR-99a	AACCCGUAGAUCCGAUCUUGUG	chr26	15508992	15509013	+	920.451	1120.74	673.047	867.144	1060.19	1254.96	752.37	1264.83	1313.2	1209.08	823.663	991.591	1101.22	1327.98	772.46	1147.45	1076.19	1210.15	817.129	999.245
eca-miR-99b	CACCCGUAGAACCGACCUUGCG	chr10	21370896	21370917	+	448.511	349.126	535.945	336.568	466.988	213.126	635.887	350.427	444.341	311.09	518.396	356.901	364.5	242.295	673.298	368.768	421.896	318.836	565.487	371.555
eca-miR-100	AACCCGUAGAUCCGAACUUGUG	chr7	29549423	29549444	-	12.2727	17.7093	15.5798	12.8625	10.3265	14.0642	15.2766	23.0869	19.8262	13.8975	22.3366	29.6668	11.5714	13.4036	24.1654	21.7379	16.6851	15.2797	27.3319	22.1352
eca-miR-101	UACAGUACUGUGAUAACUGAA	chr5	95527968	95527988	+	16713.2	15552.5	14955.6	11458.3	15601.1	15209.8	17471.6	10940.7	15913.5	13604.6	20766.5	16289.8	17230.8	14767.6	14645.9	15160.6	16674.4	12182	14746	15124.7
		chr23	26335643	26335663	+
eca-miR-103	AGCAGCAUUGUACAGGGCUAUGA	chr22	19043294	19043316	-	8668.97	8602.91	7695.38	7440.93	9075.86	7232.22	9348.3	7499.13	7720.57	7647.89	8292.47	9008.83	7507.94	6481.14	9135.36	8236.34	7689.46	7179.4	7747.17	8729.17
eca-miR-105	UCAAAUGCUCAGACUCCUGUGGU	chrX	120987014	120987036	-	2.2314	0	0	0	1.14739	0	0	0	0	0	0	0	0	0	0	0	0	0	0	0
eca-miR-106a	CAAAGUGCUUACAGUGCAGGUAG	chrX	106692747	106692769	-	1179.29	837.396	909.86	911.091	1139.36	904.433	989.157	792.377	861.858	730.152	1001.42	1043.73	955.608	745.444	1009.11	894.36	834.257	740.554	805.819	1004.78
eca-miR-106b	UAAAGUGCUGACAGUGCAGAU	chr13	8034729	8034749	-	1300.9	1307.96	1362.71	1078.3	1285.08	1175.98	1188.71	1003.46	1096.27	1067.97	1249.92	1155.21	1271.89	1170.23	1149.11	1107.86	997.533	1012.53	1114.01	1162.1
eca-miR-107a	AGCAGCAUUGUACAGGGCUAUGA	chr14	12370517	12370539	+	8214.88	8185.48	6907.04	6915.71	9079.3	6441.38	8850.85	7185.81	7325.21	6871.77	7536.74	8634.84	6896.58	5920.25	8727.04	7730.94	7417.73	6639.52	7149.64	8529.16
eca-miR-107b	AGCAGCAUUGUACAGGGCUAUCA	chr1	38749414	38749436	+	513.221	542.663	679.279	561.661	504.852	539.847	528.951	624.996	452.504	559.106	593.782	456.689	530.358	513.46	533.305	523.263	465.992	534.788	577.739	476.697
eca-miR-122	UGGAGUGUGACAAUGGUGUUUG	chr8	75662544	75662565	+	153.966	164.443	235.774	131.84	235.215	351.604	338.949	378.461	323.051	295.054	289.445	329.032	273.857	313.437	357.481	371.097	271.729	423.756	550.407	227.676
eca-miR-124	UAAGGCACGCGGUGAAUGCC	chr9	20522393	20522412	-	0	0	0	0	0	0	0	0	0	1.06904	0	0	0	0	0.83329	0	0	0	0	0
		chr2	57945147	57945166	-
eca-miR-125a-3p	ACAGGUGAGGUUCUUGGGAGCC	chr10	21371616	21371637	+	2.2314	3.79485	4.15461	2.14374	9.17912	2.16372	7.63828	4.12267	4.66499	0	3.72277	0.898995	2.89286	2.06209	5.83303	1.55271	4.76718	2.03729	0.942478	2.37163
eca-miR-125a-5p	UCCCUGAGACCCUUUAACCUGUGA	chr10	21371578	21371601	+	1055.45	731.14	1631.72	947.534	843.332	522.537	1447.45	766.816	861.858	624.318	1413.72	614.912	907.394	508.304	1466.59	696.39	951.053	538.863	1556.97	601.603
eca-miR-125b-5p	UCCCUGAGACCCUAACUUGUGA	chr7	29500017	29500038	-	79.2145	65.7773	40.5075	47.1623	82.6121	76.8119	56.3323	54.4192	81.6374	76.9707	50.2574	44.9497	68.4644	47.428	56.6637	52.7921	69.1241	60.1	48.0664	47.4325
		chr26	15553175	15553196	+
eca-miR-126-3p	UCGUACCGUGAGUAAUAAUGCG	chr25	37315408	37315429	-	1268.55	822.216	791.454	1438.45	1643.06	1154.34	1184.89	1953.32	1469.47	904.405	1302.04	2461.45	1324.93	1012.48	1212.44	2204.07	1259.73	890.295	1013.16	2282.3
eca-miR-126-5p	CAUUAUUACUUUUGGUACGCG	chr25	37315446	37315466	-	54.6692	21.5041	39.4688	42.8749	49.3378	43.2743	42.9653	54.4192	44.3174	34.2092	53.9801	76.4146	29.8929	46.397	37.498	75.3064	42.9046	41.7644	45.239	67.1961
eca-miR-127	UCGGAUCCGUCUGAGCUUGGCU	chr24	42747047	42747068	+	0	0	2.07731	2.14374	3.44217	4.32743	0.954785	4.12267	5.83124	0	0.930692	4.49497	1.92857	4.12417	2.49987	6.21084	3.57539	7.13051	2.82744	6.32434
eca-miR-128	UCACAGUGAACCGGUCUCUUU	chr16	49087175	49087195	-	27703.9	23166.3	27324.9	31324.4	23526.1	24408.9	22558.7	32235.1	30025.1	24929.9	24504.2	28402.8	26678.9	28502.2	29200.1	29033.3	26182.6	27487.1	34525.8	24954.3
		chr18	19492393	19492413	+
eca-miR-129a-3p	AAGCCCUUACCCCAAAAAGUAU	chr4	83387854	83387875	+	45.7436	43.0082	46.7394	16.0781	56.2221	33.5376	41.0557	15.6661	62.9774	44.8996	53.9801	17.0809	51.1072	35.0555	45.8309	10.869	38.1374	38.7085	34.8717	15.8108
eca-miR-129a-5p	CUUUUUGCGGUCUGGGCUUGC	chr4	83387810	83387830	+	53.5535	31.6237	44.6621	11.7906	67.696	34.6195	41.0557	25.5605	57.1462	35.2782	33.5049	24.2729	40.5001	42.2728	29.9984	15.5271	46.48	39.7271	43.354	23.7163
eca-miR-129b-3p	AAGCCCUUACCCCAAAAAGCAU	chr12	8531010	8531031	+	7.80988	12.6495	12.4638	6.43123	6.88434	1.08186	9.54785	6.59627	9.32999	8.5523	4.65346	5.39397	7.7143	12.3725	9.16619	1.55271	14.3015	11.2051	7.53983	3.95271
eca-miR-129b-5p	CUUUUUGCGGUCUGGGCUUGC	chr12	8530968	8530988	+	55.7849	37.9485	36.3529	28.9405	50.4852	30.292	45.8297	26.3851	66.4762	37.4163	40.0198	24.2729	58.8215	42.2728	46.6642	22.5143	58.398	30.5593	39.5841	14.2298
eca-miR-130a	CAGUGCAAUGUUAAAAGGGCAU	chr12	17657932	17657953	+	8.92558	2.5299	8.30923	66.456	8.03173	9.73672	11.4574	72.5589	8.16374	2.13807	10.2376	88.1015	10.6072	6.18626	12.4993	76.8591	10.7262	7.13051	11.3097	106.723
eca-miR-130b	CAGUGCAAUGAUGAAAGGGCAU	chr8	3383159	3383180	+	34.5866	26.5639	43.6234	39.6592	28.6848	29.2102	32.4627	43.7003	24.4912	18.1736	26.0594	42.2528	21.2143	17.5277	24.1654	35.7123	16.6851	14.261	19.792	38.7366
eca-miR-132	UAACAGUCUACAGCCAUGGUCG	chr11	45639839	45639860	-	33.4709	13.9144	14.5411	15.0062	1248.36	924.989	976.745	417.214	960.989	949.305	875.781	759.651	1689.43	2115.7	1857.4	1221.98	1555.29	1957.83	1625.78	1201.62
eca-miR-133a	UUUGGUCCCCUUCAACCAGCUG	chr22	48444308	48444329	+	1.1157	1.26495	0	0	0	0	0	1.64907	0	0	2.79208	0.898995	0	0	5.83303	0.776354	0	2.03729	0.942478	1.58108
		chr8	39915645	39915666	+
eca-miR-133b	UUUGGUCCCCUUCAACCAGCUA	chr20	49824745	49824766	+	0	0	0	0	0	0	0	0	0	0	0	0	0	0	0.83329	0	0	1.01864	0	0
eca-miR-134	UGUGACUGGUUGACCAGAGGGG	chr24	42925251	42925272	+	0	0	0	0	0	0	0	0	1.16625	0	0	0.898995	0	0	0	0	0	0	0	0
eca-miR-135a	UAUGGCUUUUUAUUCCUAUGUGA	chr16	35417147	35417169	+	1.1157	1.26495	2.07731	8.57497	0	5.40929	7.63828	6.59627	2.3325	5.34519	4.65346	9.88894	0	2.06209	4.16645	7.76354	1.1918	2.03729	3.76991	3.16217
		chr28	22270420	22270442	+
eca-miR-135b	UAUGGCUUUUCAUUCCUAUGUGA	chr5	1903389	1903411	-	6.69419	1.26495	5.19327	2.14374	5.73695	2.16372	2.86435	0.824533	2.3325	2.13807	9.30692	2.69698	0	3.09313	8.3329	3.88177	2.38359	3.05593	6.59735	0
eca-miR-137	UUAUUGCUUAAGAAUACGCGUAG	chr5	67623822	67623844	+	0	0	0	0	0	0	0	0	0	0	0	0.898995	0	1.03104	0.83329	0	0	0	0	0.790542
eca-miR-138	AGCUGGUGUUGUGAAUCAGGCCG	chr3	9201088	9201110	+	26.7767	16.4443	7.27057	9.64684	30.9795	11.9004	13.367	14.0171	19.8262	6.41422	11.1683	17.9799	30.8572	7.2173	5.83303	6.98719	15.4933	9.1678	8.48231	12.6487
		chr16	42248878	42248900	-
eca-miR-139-3p	GGAGACGCGGCCCUGUUGGAGU	chr7	71082299	71082320	+	16.7355	13.9144	11.4252	18.2218	16.0635	10.8186	14.3218	19.7888	25.6575	13.8975	6.51484	15.2829	4.82143	9.27939	9.16619	13.9744	13.1097	16.2983	8.48231	9.48651
eca-miR-139-5p	UCUACAGUGCACGUGUCUCCAG	chr7	71082262	71082283	+	266.652	341.536	405.075	350.502	315.532	322.394	319.853	365.268	327.716	297.192	347.148	327.234	296.036	315.499	338.316	354.794	282.455	319.854	389.244	283.805
eca-miR-140-3p	UACCACAGGGUAGAACCACGG	chr3	19908715	19908735	+	35205.8	38249.5	34121.8	28638.3	40600.4	28395.5	41445.3	29550.5	37694.3	33114.5	33910.7	37931.3	32643	28945.5	36128.9	33190.7	32788.7	30321	32974.5	35011.5
eca-miR-140-5p	CAGUGGUUUUACCCUAUGGUAG	chr3	19908676	19908697	+	5563.99	4179.39	5448.78	4698.01	5564.84	5335.72	6506.86	3751.63	4178.67	4160.69	6190.96	4920.2	5055.76	4543.81	6158.01	4151.17	3682.65	4444.34	5074.3	4958.28
eca-miR-141	UAACACUGUCUGGUAAAGAUGG	chr6	34423537	34423558	+	6.69419	6.32474	6.23192	7.5031	6.88434	18.3916	5.72871	3.29813	4.66499	4.27615	6.51484	6.29296	7.7143	10.3104	9.16619	7.76354	3.57539	4.07458	6.59735	8.69596
eca-miR-142-3p	UGUAGUGUUUCCUACUUUAUGGA	chr11	32583175	32583197	-	9369.63	5925.02	9239.86	7350.89	7910.11	8968.6	8199.69	4891.96	6029.51	5827.32	12173.5	6577.05	8260.08	7303.91	7493.78	6161.15	5361.89	5686.07	7154.35	7575.77
eca-miR-142-5p	CAUAAAGUAGAAAGCACUACU	chr11	32583213	32583233	-	53270.1	69736.6	82005.8	61177.1	50852.3	74290.1	50758.3	51539.1	63655	63142.7	83083.8	38806	61610.2	68431.4	47116.7	50744.1	63864.7	57928.2	63964.1	40388.8
eca-miR-143	UGAGAUGAAGCACUGUAGCUC	chr14	28434701	28434721	-	3.34709	1.26495	3.11596	7.5031	2.29478	2.16372	2.86435	4.12267	2.3325	5.34519	0.930692	8.09095	3.85715	3.09313	4.16645	5.43448	3.57539	0	2.82744	7.90542
eca-miR-144	UACAGUAUAGAUGAUGUACU	chr11	42750585	42750604	-	13.3884	1.26495	11.4252	7.5031	5.73695	3.24557	3.81914	9.8944	10.4962	6.41422	24.198	8.98995	6.75001	3.09313	7.49961	6.98719	11.918	6.11186	8.48231	7.11488
eca-miR-145	GUCCAGUUUUCCCAGGAAUCCCU	chr14	28433311	28433333	-	0	0	0	0	0	0	0	0	0	0	0	0.898995	0	0	0	0	0	0	0	0
eca-miR-146a	UGAGAACUGAAUUCCAUGGGUU	chr14	19243309	19243330	-	18901	24112.4	19573.4	26311.2	23406.8	25073.1	20608.1	29766.5	29062.9	30301.9	21024.3	25353.5	32555.3	33549.1	27873.5	27714.3	44103.6	41379.4	36167.6	28538.6
eca-miR-146b-3p	UGCCCUAGGGACUCAGUUCUGG	chr1	27716553	27716574	-	41.2808	146.734	34.2756	27.8687	67.696	179.588	46.7845	23.0869	107.295	234.119	86.5544	30.5658	274.822	293.847	257.487	62.1084	368.265	408.476	305.363	59.2907
eca-miR-146b-5p	UGAGAACUGAAUUCCAUAGGCU	chr1	27716590	27716611	-	3108.33	8339.8	2466.8	2051.56	3550.03	7518.91	2508.22	2472.78	4501.72	9017.33	3008.93	2188.15	12770.1	14427.4	11577.7	3211.78	15437.3	18958	15127.7	4062.6
eca-miR-147b	GUGUGCCGAAAUGCUUCUGCUA	chr2	104313875	104313896	+	1.1157	1.26495	0	1.07187	0	0	0	0	0	0	0	0	0	0	0.83329	0	0	0	0	0
eca-miR-148a	UCAGUGCACUACAGAACUUUGU	chr4	57171935	57171956	-	70679.5	96147.5	85896.6	95000	76192.5	97317.5	60707.1	119627	131029	92111.4	96309	108038	107093	97304.7	51808.1	122630	102223	82178.1	75590.5	92064.2
eca-miR-148b-3p	UCAGUGCAUCACAGAACUUUGU	chr6	71148073	71148094	+	5184.65	5392.48	5876.7	5505.13	5383.56	6773.51	5770.72	6517.94	6750.25	6183.31	7234.27	5370.59	7460.69	5909.94	4862.25	6147.95	6259.31	5881.65	6088.41	4969.35
eca-miR-148b-5p	GAAGUUCUGUUAUACACUCAGG	chr6	71148034	71148055	+	326.899	304.853	278.359	267.968	321.269	299.675	333.22	263.026	335.88	266.19	341.564	301.163	310.5	299.003	304.984	290.357	345.621	255.68	312.903	323.332
eca-miR-149	UCUGGCUCCGUGUCUUCACUCCC	chr6	25975944	25975966	+	14.5041	24.034	18.6958	21.4374	14.9161	33.5376	16.2313	19.7888	19.8262	37.4163	17.6832	8.09095	18.3215	24.745	16.6658	13.198	17.8769	29.5407	22.6195	13.4392
eca-miR-150	UCUCCCAACCCUUGUACCAGUG	chr10	19329748	19329769	-	113706	120395	113461	113517	111035	96383.8	120658	88862.4	103220	122891	110914	97635.3	90861.9	108801	118195	96418.6	101456	114767	110370	111417
eca-miR-151-5p	UCGAGGAGCUCACAGUCUAGU	chr9	79874740	79874760	-	1177.06	540.133	1244.31	721.369	1034.95	686.98	838.301	1156.82	936.498	751.533	563.999	1303.54	1070.36	958.87	1600.75	883.491	606.624	737.498	1458.96	1158.14
eca-miR-153	UUGCAUAGUCACAAAAGUGAUC	chr4	107797724	107797745	-	1.1157	1.26495	0	0	0	0	0	0	0	0	0.930692	0	0	0	0.83329	0	0	0	0	0
		chr6	8829309	8829330	-
eca-miR-155	UUAAUGCUAAUCGUGAUAGGGGU	chr26	23253377	23253399	+	6091.71	5928.81	6201.8	5342.21	6907.29	6950.94	5697.2	5046.14	10341.1	9705.79	9015.61	5944.15	11640.9	10382.6	11893.5	6241.89	17426.4	15402.9	18336.9	10244.6
eca-miR-181a	AACAUUCAACGCUGUCGGUGAGU	chr25	28672660	28672682	+	13223.3	11237.8	15630.7	18902.5	14756.6	13407.5	15465.6	19073.1	12819.4	11657.8	14931.1	17472.9	13045.8	11644.6	14025.9	17850.7	11982.3	11730.7	13412.4	18579.3
		chr30	26398982	26399004	-
eca-miR-181b	AACAUUCAUUGCUGUCGGUGGGU	chr25	28673916	28673938	+	924.913	924.677	1080.2	1644.25	951.187	923.907	1035.94	1473.44	953.991	827.435	966.989	1361.08	927.644	813.493	997.448	1482.84	927.217	837.325	1081.02	1432.46
eca-miR-182	UUUGGCAAUGGUAGAACUCACACUG	chr4	84467103	84467127	-	44.6279	70.8371	63.3578	64.3123	41.3061	49.7655	55.3775	51.1211	46.6499	53.4519	63.2871	44.9497	41.4643	49.4901	57.497	62.1084	34.5621	46.8576	54.6638	41.8987
eca-miR-183	UAUGGCACUGGUAGAAUUCACU	chr4	84472045	84472066	-	24.5454	43.0082	33.2369	41.803	29.8322	30.292	40.101	54.4192	41.9849	56.659	44.6732	50.3437	28.9286	46.397	38.3313	69.0955	30.9867	43.8017	38.6416	41.1082
eca-miR-184	UGGACGGAGAACUGAUAAGGGU	chr1	115216739	115216760	-	4.46279	5.05979	4.15461	13.9343	4.58956	4.32743	4.77392	26.3851	9.32999	6.41422	6.51484	24.2729	8.67858	5.15522	10.8328	27.1724	2.38359	3.05593	9.42478	16.6014
eca-miR-186	CAAAGAAUUCUCCUUUUGGGCU	chr5	90710661	90710682	+	11771.7	13995.4	15889.3	12300.8	12028.1	14263.2	11407.8	12024.2	12130.2	12022.4	14143.7	9890.74	13586.8	13618	11987.7	11827	12816.6	12087.2	13534	10461.2
eca-miR-187	UCGUGUCUUGUGUUGCAGCCGG	chr8	56143025	56143046	-	17.8512	8.85464	9.34788	15.0062	19.5056	10.8186	5.72871	4.12267	15.1612	9.62133	7.44554	8.09095	11.5714	11.3415	4.16645	9.31625	13.1097	11.2051	4.71239	7.11488
eca-miR-188-3p	CUCCCACAUGCAGGGUUUGCA	chrX	40068891	40068911	+	3.34709	0	3.11596	1.07187	2.29478	1.08186	0.954785	0	1.16625	3.20711	0	0	0	1.03104	2.49987	0	0	2.03729	0	0
eca-miR-188-5p	CAUCCCUUGCAUGGUGGAGGG	chrX	40068852	40068872	+	51.3221	37.9485	38.4302	28.9405	39.0113	53.011	36.2818	20.6133	38.4862	40.6234	43.7425	21.5759	55.9286	45.3659	45.8309	29.5015	33.3703	58.0627	24.5044	37.1555
eca-miR-190a	UGAUAUGUUUGAUAUAUUAGGU	chr1	129246415	129246436	-	0	0	0	0	0	0	0	0.824533	0	0	0	0	0	0	0	0	0	0	0	0
eca-miR-190b	UGAUAUGUUUGAUAUUGGGUU	chr5	43502629	43502649	+	53.5535	48.068	75.8217	50.378	55.0747	49.7655	56.3323	38.7531	54.8137	51.3138	76.3168	48.5457	54.0001	51.5522	69.9963	55.1212	59.5898	50.9322	82.9381	52.1758
eca-miR-191a	CAACGGAAUCCCAAAAGCAGCUG	chr16	38001165	38001187	+	48113.4	49058.5	46641.8	57947.5	50819.1	56897.1	50989.3	63175.7	45996.8	57755.8	50720.9	50668.2	47501.7	47942.5	47119.2	57220.4	50109	52055.8	45397.3	53675.4
eca-miR-191b	GAACGAAAUCCAAGCGCAGCUG	chr16	38001205	38001226	-	0	0	0	0	0	0	0	1.64907	1.16625	5.34519	0	2.69698	0.964287	0	0	3.10542	0	1.01864	0	0
eca-miR-192	CUGACCUAUGAAUUGACAGCC	chr12	25044278	25044298	-	224.255	245.4	334.446	197.224	270.784	260.728	282.616	247.36	337.046	258.707	339.703	276.89	269.036	278.382	279.985	267.842	232.4	267.903	333.637	251.392
eca-miR-193a-3p	AACUGGCCUACAAAGUCCCAGU	chr11	40807855	40807876	-	0	3.79485	1.03865	1.07187	0	1.08186	0	0.824533	0	0	1.86138	1.79799	0	1.03104	0.83329	0.776354	0	1.01864	0	0
eca-miR-193a-5p	UGGGUCUUUGCGGGCGAGAUGA	chr11	40807889	40807910	-	43.5122	45.5381	46.7394	20.3656	33.2743	29.2102	58.2419	26.3851	41.9849	27.795	39.0891	28.7678	37.6072	29.9003	46.6642	21.7379	32.1785	27.5034	38.6416	22.1352
eca-miR-193b	AACUGGCCCACAAAGUCCCGCU	chr13	30687484	30687505	-	24.5454	50.5979	59.2032	20.3656	137.687	154.706	132.715	153.363	114.292	166.77	120.059	122.263	213.107	389.734	252.487	239.117	250.277	333.097	378.876	222.933
eca-miR-194	UGUAACAGCAACUCCAUGUGGA	chr12	25044478	25044499	-	33.4709	35.4186	56.0873	49.3061	39.0113	48.6836	54.4227	40.4021	41.9849	36.3473	67.9405	38.6568	31.8215	43.3038	59.9969	40.3704	22.6441	42.783	41.4691	40.3177
		chr30	10337974	10337995	-
eca-miR-195	UAGCAGCACAGAAAUAUUGGC	chr11	50048922	50048942	-	17.8512	8.85464	11.4252	6.43123	10.3265	8.65486	9.54785	4.9472	12.8287	6.41422	9.30692	6.29296	5.78572	12.3725	10.8328	4.65813	8.34257	13.2424	6.59735	6.32434
eca-miR-196a	UAGGUAGUUUCAUGUUGUUGGG	chr11	24681667	24681688	-	0	3.79485	4.15461	2.14374	0	2.16372	1.90957	4.9472	2.3325	0	0.930692	3.59598	2.89286	2.06209	0.83329	0.776354	1.1918	2.03729	1.88496	0.790542
eca-miR-196b	UAGGUAGUUUCCUGUUGUUGGG	chr4	58199227	58199248	-	97.0657	58.1876	37.3915	52.5217	65.4013	97.3672	45.8297	61.84	64.1437	88.7301	58.6336	51.2427	80.0358	82.4835	48.3308	65.2138	71.5077	82.5102	49.9514	45.0609
eca-miR-197	UUCACCACCUUCUCCACCCAGC	chr5	58536559	58536580	-	2241.44	3016.9	2078.35	1978.67	2157.09	1800.21	2069.02	1819.75	1903.32	2361.5	1826.02	2108.14	1572.75	2211.59	2303.21	1758.44	1879.46	2315.38	2015.96	1875.17
eca-miR-199a-3p	ACAGUAGUCUGCACAUUGGUUA	chr5	8104740	8104761	-	33.4709	17.7093	23.889	61.0967	34.4217	22.719	35.327	103.891	19.8262	25.6569	36.297	77.3136	45.3215	28.8692	35.8315	88.5044	26.2195	29.5407	33.9292	64.0339
eca-miR-199a-5p	CCCAGUGUUCAGACUACCUGUUC	chr5	8104778	8104800	-	8.92558	8.85464	5.19327	33.228	19.5056	9.73672	5.72871	24.736	22.1587	7.48326	9.30692	42.2528	17.3572	10.3104	7.49961	37.265	19.0687	11.2051	9.42478	42.6893
eca-miR-199b-3p	ACAGUAGUCUGCACAUUGGUUA	chr25	31553695	31553716	-	32.3552	21.5041	28.0436	56.8092	24.0952	25.9646	32.4627	98.1195	39.6525	41.6924	31.6435	81.8085	30.8572	29.9003	33.3316	92.3862	38.1374	30.5593	43.354	67.1961
eca-miR-199b-5p	CCCAGUGUUUAGACUAUCUGUUC	chr25	31553733	31553755	-	39.0494	21.5041	39.4688	92.1809	44.7482	42.1925	63.0158	135.223	59.4787	48.1067	80.0395	134.849	50.1429	29.9003	48.3308	119.559	42.9046	48.8949	65.031	100.399
eca-miR-200a	UAACACUGUCUGGUAACGAUGU	chr2	48454419	48454440	-	1.1157	2.5299	2.07731	0	0	4.32743	0.954785	0.824533	1.16625	2.13807	2.79208	4.49497	0.964287	2.06209	0	1.55271	1.1918	1.01864	2.82744	2.37163
eca-miR-200b	UAAUACUGCCUGGUAAUGAUGA	chr2	48455075	48455096	-	1.1157	3.79485	2.07731	1.07187	2.29478	2.16372	2.86435	1.64907	4.66499	3.20711	1.86138	1.79799	2.89286	2.06209	1.66658	3.10542	4.76718	1.01864	0.942478	4.74325
eca-miR-200c	UAAUACUGCCGGGUAAUGAUGGA	chr6	34423122	34423144	+	61.3634	68.3072	40.5075	46.0905	60.8117	50.8473	59.1967	46.9984	48.9824	38.4853	50.2574	62.0306	45.3215	57.7384	60.8302	65.9901	47.6718	48.8949	48.0664	49.0136
eca-miR-204b	UUCCCUUUGUCAUCCUAUGCCU	chr23	20137069	20137090	+	0	0	0	1.07187	0	1.08186	0.954785	0.824533	0	0	0	1.79799	0	0	0	1.55271	0	1.01864	0	0.790542
eca-miR-205	UCCUUCAUUCCACCGGAGUCUG	chr5	28811841	28811862	-	0	0	2.07731	0	0	0	0	0.824533	0	0	0	0	0	0	0.83329	0	0	0	0	0
eca-miR-206	UGGAAUGUAAGGAAGUGUGUGG	chr20	49820638	49820659	+	0	0	0	0	0	0	0	0	0	0	0.930692	0	0	0	0.83329	0	1.1918	0	0	0
eca-miR-208b	AUAAGACGAACAAAAGGUUUGU	chr1	161511741	161511762	-	0	0	0	0	0	0	0	0	0	0	0	0	0.964287	0	0	0	0	0	0	0
eca-miR-211	UUCCCUUUGUCAUCCUUUGCCU	chr1	108264829	108264850	-	22.314	56.9227	40.5075	100.756	20.653	51.9292	36.2818	150.89	38.4862	40.6234	43.7425	89.8995	24.1072	41.2417	35.8315	114.9	23.8359	47.8763	58.4337	94.8651
eca-miR-212	UAACAGUCUCCAGUCACGGCC	chr11	45640251	45640271	-	0	1.26495	0	1.07187	26.39	21.6372	17.1861	7.4208	16.3275	20.3117	28.8515	27.8688	55.9286	64.9557	59.9969	35.7123	51.2472	66.2119	50.8938	41.1082
eca-miR-214	ACAGCAGGCACAGACAGGCAGU	chr5	8098955	8098976	-	0	0	0	0	0	1.08186	0	0	0	0	0	0	0	0	0	0	1.1918	0	0	0
eca-miR-215	AUGACCUAUGAAUUGACAGAC	chr30	10337684	10337704	-	5.57849	8.85464	3.11596	15.0062	12.6213	9.73672	13.367	27.2096	12.8287	9.62133	13.9604	45.8487	13.5	5.15522	15.8325	34.9359	13.1097	13.2424	10.3673	36.3649
eca-miR-216a	UAAUCUCAGCUGGCAACUGUGA	chr15	44369414	44369435	+	0	0	0	0	0	0	0	0	0	0	0	0.898995	0	1.03104	1.66658	0	0	0	0	0
eca-miR-216b	AAAUCUCUGCAGGCAAAUGUGA	chr15	44358828	44358849	+	2.2314	1.26495	0	0	2.29478	2.16372	0	0.824533	1.16625	1.06904	1.86138	1.79799	0	0	0	0.776354	2.38359	0	3.76991	0
eca-miR-217	UACUGCAUCAGGAACUGAUUGGA	chr15	44376604	44376626	+	0	0	1.03865	0	0	0	0	0	0	0	0.930692	0.898995	0	0	0.83329	0.776354	2.38359	1.01864	0	0.790542
eca-miR-218	UUGUGCUUGAUCUAACCAUGU	chr14	12167930	12167950	+	0	1.26495	0	0	1.14739	3.24557	0	0.824533	0	0	0	0.898995	0	1.03104	0	0	0	0	0	0
		chr3	103550531	103550551	-
eca-miR-219-5p	UGAUUGUCCAAACGCAAUUCU	chr20	33649538	33649558	+	4.46279	1.26495	1.03865	1.07187	6.88434	4.32743	0.954785	0.824533	3.49875	3.20711	4.65346	5.39397	2.89286	1.03104	4.16645	3.10542	1.1918	0	3.76991	1.58108
		chr25	31667420	31667440	-
eca-miR-221	AGCUACAUUGUCUGCUGGGUUUC	chrX	37090670	37090692	-	4323.33	4509.54	4647.97	5910.3	4417.45	4569.77	4117.03	6776.84	4313.95	5215.83	4478.49	5644.79	5211.97	4353.07	5202.23	5971.72	5433.39	5028.03	5103.52	5549.61
eca-miR-222	AGCUACAUCUGGCUACUGGGU	chrX	37091447	37091467	-	2984.49	3297.72	2985.09	3957.35	3675.09	3697.79	3168.93	4923.29	3996.73	4014.23	3163.42	4201	5811.76	4770.64	5295.56	4703.93	5527.55	5154.34	5077.13	4442.85
eca-miR-223	UGUCAGUUUGUCAAAUACCCCA	chrX	48492656	48492677	+	9320.54	5393.74	4918.02	4033.45	9556.62	6781.09	6670.13	4822.7	7250.57	6722.1	6376.17	6734.37	7646.8	6382.16	6052.18	5116.18	7179.37	6454.13	5081.84	5483.2
eca-miR-224	CAAGUCACUAGUGGUUCCGUU	chrX	120688740	120688760	-	1.1157	1.26495	0	5.35936	0	0	0	3.29813	1.16625	0	0	6.29296	0	0	0	3.88177	0	0	0	4.74325
eca-miR-296	GAGGGUUGGGUGGAGGCUUUCC	chr22	45210459	45210480	-	25.6611	41.7433	30.1209	23.5812	33.2743	40.0287	29.5983	23.9115	37.32	50.2447	26.9901	18.8789	27.9643	39.1796	29.1651	24.067	36.9457	48.8949	31.1018	22.1352
eca-miR-299	UAUGUGGGAUGGUAAACCGCUU	chr24	42896401	42896422	+	0	2.5299	0	0	0	1.08186	0.954785	0	0	0	0	0	0	0	0	0.776354	0	1.01864	0.942478	0
eca-miR-301a	CAGUGCAAUAGUAUUGUCAAAGC	chr11	33292439	33292461	-	1.1157	3.79485	2.07731	2.14374	1.14739	1.08186	5.72871	1.64907	0	1.06904	0.930692	3.59598	2.89286	2.06209	0.83329	3.10542	3.57539	0	2.82744	6.32434
eca-miR-301b-3p	CAGUGCAAUGAUAUUGUCAAAGC	chr8	3382833	3382855	+	1.1157	0	1.03865	3.21561	5.73695	0	0.954785	2.4736	3.49875	2.13807	1.86138	1.79799	1.92857	0	1.66658	1.55271	0	1.01864	0.942478	6.32434
eca-miR-301b-5p	GCUGUGACGAUGUUGCACUACU	chr8	3382798	3382819	+	0	0	0	0	0	0	0	0.824533	0	0	0	0	0	0	0	0	0	0	0	0
eca-miR-323-3p	CACAUUACACGGUCGACCUCU	chr24	42898354	42898374	+	0	0	0	0	0	0	0	0	0	0	0	0	0	0	0	0	0	0	0.942478	0
eca-miR-324-3p	CCACUGCCCCAGGUGCUGCUGG	chr11	50242537	50242558	-	61.3634	73.367	79.9763	69.6716	48.1904	49.7655	54.4227	61.0155	45.4837	74.8326	42.8118	44.0507	56.8929	47.428	59.1636	52.7921	57.2062	69.2678	87.6505	57.7096
eca-miR-324-5p	CGCAUCCCCUAGGGCAUUGGUGU	chr11	50242571	50242593	-	53.5535	58.1876	79.9763	52.5217	58.5169	61.6659	36.2818	56.0683	50.1487	54.5209	40.9505	59.3337	54.9644	59.8005	54.1638	67.5428	32.1785	61.1186	55.6062	61.6623
eca-miR-326	CCUCUGGGCCCUUCCUCCAGC	chr7	68816885	68816905	+	124.958	121.435	97.6334	153.278	135.392	154.706	128.896	209.431	116.625	134.699	130.297	198.678	135.964	145.377	143.326	202.628	122.755	144.647	135.717	198.426
eca-miR-328	CUGGCCCUCUCUGCCCUUCCGU	chr3	17669433	17669454	-	811.112	605.91	581.646	1916.51	875.459	919.579	1153.38	3377.29	803.545	1005.96	1201.52	2486.62	968.144	939.281	1403.26	2814.28	862.86	950.395	1304.39	2654.64
eca-miR-329a	AACACACCUAGUUAACCUCUUU	chr24	42899413	42899434	+	0	0	0	0	0	0	0	0.824533	0	0	0	0	0	0	0	0	0	0	0	0
eca-miR-330	UCUCUGGGCCUGUGUCUUAGGC	chr10	16156799	16156820	-	428.428	403.519	357.297	491.989	418.798	416.515	366.637	391.653	446.673	329.263	431.841	510.629	352.929	346.431	454.976	417.679	359.922	316.798	364.739	447.447
eca-miR-331	GCCCCUGGGCCUAUCCUAGAA	chr28	20407880	20407900	+	297.891	378.22	396.766	468.408	353.396	338.622	346.587	677.766	404.688	375.232	346.217	525.912	363.536	404.169	292.485	560.528	331.319	370.786	368.509	522.548
eca-miR-335	UCAAGAGCAAUAACGAAAAAUGU	chr4	85051762	85051784	+	2.2314	1.26495	2.07731	1.07187	2.29478	3.24557	5.72871	0.824533	4.66499	0	2.79208	0.898995	2.89286	3.09313	3.33316	1.55271	2.38359	2.03729	0.942478	0
eca-miR-338-3p	UCCAGCAUCAGUGAUUUUGUUG	chr11	1976453	1976474	+	2.2314	1.26495	3.11596	1.07187	4.58956	1.08186	4.77392	0.824533	2.3325	0	0.930692	2.69698	8.67858	1.03104	0.83329	0.776354	3.57539	4.07458	0	0.790542
eca-miR-338-5p	AACAAUAUCCUGGUGCUGAGUG	chr11	1976417	1976438	+	29.0081	3.79485	4.15461	2.14374	26.39	1.08186	7.63828	3.29813	24.4912	3.20711	7.44554	1.79799	27	1.03104	4.16645	3.10542	20.2605	5.09322	10.3673	3.16217
eca-miR-340-3p	UCCGUCUCAGUUACUUUAUAGCC	chr14	2525775	2525797	+	1466.03	981.6	1063.58	1155.48	1557.01	1317.7	1345.29	1008.4	1385.5	1035.9	1499.35	1259.49	1356.75	1208.38	1464.09	1156.77	1244.23	1099.12	1202.6	1186.6
eca-miR-340-5p	UUAUAAAGCAAUGAGACUGAUU	chr14	2525733	2525754	+	5817.25	6414.55	7937.39	5123.54	5157.52	7796.95	5841.37	5379.26	6728.09	5987.68	9203.61	4500.37	7704.65	7391.55	4851.41	6191.43	7190.1	5465.02	6759.46	4367.75
eca-miR-342-3p	UCUCACACAGAAAUCGCACCCGU	chr24	42060913	42060935	+	4027.67	7707.33	5210.92	5158.92	3849.5	4901.9	4136.13	4548.13	3700.51	5664.83	4109.94	4076.94	3536.04	4992.31	4198.11	4117.78	4190.35	5361.12	4465.46	4438.1
eca-miR-342-5p	AGGGGUGCUAUCUGUGAUUGAG	chr24	42060871	42060892	+	554.502	318.767	307.441	439.467	438.303	371.077	504.126	437.827	391.86	426.546	351.802	635.589	387.643	517.584	715.796	411.468	297.949	495.061	585.279	476.697
eca-miR-345-3p	CCUGAACUAGGGGUCUGGAGGC	chr24	42228042	42228063	+	124.958	172.033	117.368	133.984	137.687	140.642	118.393	93.1723	141.116	130.423	120.99	90.7985	121.5	128.88	122.494	90.8335	171.619	146.685	122.522	100.399
eca-miR-345-5p	GCUGACUCCUAGUCCAGUGCUC	chr24	42228004	42228025	+	25.6611	20.2392	27.005	16.0781	22.9478	21.6372	22.9148	12.368	22.1587	22.4498	14.8911	13.4849	21.2143	23.714	21.6655	15.5271	22.6441	14.261	14.1372	15.8108
eca-miR-350	UUCACAAAGCCCAUACACUUUUAC	chr30	1800095	1800118	+	165.123	265.639	266.934	226.165	141.129	248.827	143.218	200.362	160.942	290.778	189.861	149.233	157.179	323.748	177.491	160.705	191.879	276.053	215.828	132.811
eca-miR-361-3p	UCCCCCAGGCGUGAUUCUGAUUU	chrX	65084151	65084173	-	11483.9	13584.3	12138.7	14682.5	11727.5	13052.6	12307.2	17469.4	14246.9	14755.9	11858.9	16306.9	12155.8	13254.1	12301.9	15461.9	12885.7	14278.3	14121.2	14360.2
eca-miR-361-5p	UUAUCAGAAUCUCCAGGGGUAC	chrX	65084190	65084211	-	918.219	791.858	894.28	1169.41	1030.36	838.44	983.428	1442.93	847.863	796.433	926.969	1572.34	879.43	807.307	975.782	1334.55	870.011	835.288	947.191	1597.69
eca-miR-362-3p	AACACACCUAUUCAAGGAUUCA	chrX	40073869	40073890	+	16.7355	11.3845	9.34788	7.5031	4.58956	6.49115	6.68349	4.12267	11.6625	10.6904	14.8911	3.59598	3.85715	7.2173	2.49987	3.10542	4.76718	7.13051	7.53983	5.5338
eca-miR-362-5p	AAUCCUUGGAACCUAGGUGUGAGU	chrX	40073832	40073855	+	631.485	614.765	662.661	361.221	590.906	580.958	454.478	365.268	546.971	466.1	507.227	269.698	625.822	548.515	475.808	350.912	530.349	543.956	493.859	262.46
eca-miR-363	AAUUGCACGGUAUCCAUCUGUA	chrX	106691887	106691908	-	4048.87	4099.7	4512.95	5167.49	4046.85	4395.59	4330.9	5035.43	3792.64	4018.51	4204.87	5044.26	3698.04	3899.41	4488.1	4977.21	3626.63	4106.15	4190.26	5295.84
eca-miR-365	UAAUGCCCCUAAAAAUCCUUAU	chr11	40795087	40795108	-	37.9337	59.4526	56.0873	26.7968	50.4852	64.9115	87.8402	42.0512	44.3174	64.1422	68.8712	39.5558	67.5001	104.135	100.828	68.3192	72.6995	76.3983	109.328	51.3852
		chr13	30682640	30682661	-
eca-miR-369-3p	AAUAAUACAUGGUUGAUCUUU	chr24	42935976	42935996	+	0	0	3.11596	0	1.14739	2.16372	0.954785	0	2.3325	0	0	0	0.964287	0	2.49987	0	1.1918	1.01864	0	0
eca-miR-369-5p	AGAUCGACCGUGUCAUAUUCGC	chr24	42935941	42935962	+	1.1157	0	0	0	0	0	0	0	0	0	0	0	0	0	0	0	0	0	0	0
eca-miR-370	GCCUGCUGGGGUGGAACCUGGU	chr24	42773789	42773810	+	0	0	0	0	0	0	0	0	0	0	0	0	0	0	0	0	0	2.03729	0	0
eca-miR-372	AAAGUGCUGCGACAUUUGAGUGU	chr10	22832206	22832228	+	0	0	0	1.07187	0	0	0	0	0	0	0	0	0	0	0	0	0	0	0.942478	0
eca-miR-374a	UUAUAAUACAACCUGAUAAGUG	chrX	55500635	55500656	-	828.963	721.021	904.667	731.016	898.407	1254.96	832.572	617.575	691.585	645.698	1398.83	738.974	904.501	789.779	754.127	705.706	655.487	672.305	714.399	717.812
eca-miR-374b	AUAUAAUACAACCUGCUAAGUG	chrX	55436024	55436045	-	381.569	349.126	313.673	353.718	382.081	336.458	376.185	328.164	330.048	317.504	378.792	413.538	320.143	297.972	349.148	337.714	294.373	357.544	330.81	344.676
eca-miR-376c	AACAUAGAGGAAAUUCCACGU	chr24	42911146	42911166	+	0	0	1.03865	0	0	0	0	0.824533	0	0	0	0.898995	0	0	0	0	0	0	0	0
eca-miR-378	ACUGGACUUGGAGUCAGAAGG	chr14	28186799	28186819	-	9092.94	8492.86	6532.09	5566.23	9882.47	6816.79	7458.78	4691.59	9888.62	7551.68	5936.89	5833.58	9538.73	8586.53	7621.27	5558.7	8169.76	7503.33	6015.84	5402.57
eca-miR-379	UGGUAGACUAUGGAACGUAGG	chr24	42894648	42894668	+	0	0	0	0	2.29478	0	0.954785	0	1.16625	1.06904	0.930692	0	0.964287	0	0.83329	1.55271	0	3.05593	0.942478	0.790542
eca-miR-380	UAUGUAAUAUGGUCCACGUCUU	chr24	42897631	42897652	+	1.1157	1.26495	1.03865	0	0	2.16372	0	1.64907	2.3325	0	2.79208	0	0	1.03104	3.33316	0	1.1918	3.05593	2.82744	0.790542
eca-miR-381	UAUACAAGGGCAAGCUCUCUGU	chr24	42916102	42916123	+	0	2.5299	2.07731	1.07187	3.44217	2.16372	3.81914	2.4736	2.3325	1.06904	4.65346	0.898995	0	5.15522	2.49987	4.65813	3.57539	3.05593	2.82744	3.16217
eca-miR-382	GAAGUUGUUCGUGGUGGAUUCG	chr24	42924872	42924893	+	0	0	0	0	0	0	0	0.824533	1.16625	1.06904	0	0	0.964287	0	0	1.55271	0	0	0	0
eca-miR-383	AGAUCAGAAGGUGAUUGUGGCU	chr27	18266630	18266651	-	2.2314	0	3.11596	37.5155	3.44217	8.65486	3.81914	77.5061	2.3325	7.48326	2.79208	46.7477	1.92857	11.3415	3.33316	66.7665	2.38359	11.2051	2.82744	45.8514
eca-miR-384	AUUCCUAGAAAUUGUUCACA	chrX	57166993	57167012	-	0	1.26495	0	0	0	0	0	0	0	0	0	0	0	0	0	0	0	0	0	0
eca-miR-409-3p	GAAUGUUGCUCGGUGAACCCCU	chr24	42935680	42935701	+	1.1157	0	1.03865	1.07187	0	0	0	0.824533	0	1.06904	0	4.49497	1.92857	2.06209	1.66658	2.32906	1.1918	2.03729	1.88496	0.790542
eca-miR-409-5p	AGGUUACCCGAGCAACUUUGCAU	chr24	42935648	42935670	+	0	0	0	0	0	0	0	0.824533	0	0	0	0	0	0	0	0	0	1.01864	0.942478	0
eca-miR-410	AAUAUAACACAGAUGGCCUGU	chr24	42936306	42936326	+	0	0	0	0	0	1.08186	0	0	2.3325	0	0	0	0	0	0	0	0	0	0	0
eca-miR-411	UAGUAGACCGUAUAGCGUACG	chr24	42895910	42895930	+	1.1157	0	0	0	0	2.16372	0.954785	0	0	2.13807	0.930692	0	0.964287	0	0.83329	0.776354	0	1.01864	0.942478	0.790542
eca-miR-421	GGCCUCAUUAAAUGUUUGUUG	chrX	55435868	55435888	-	13.3884	10.1196	18.6958	15.0062	3.44217	3.24557	1.90957	1.64907	3.49875	2.13807	4.65346	2.69698	0	7.2173	0.83329	0	0	2.03729	0.942478	1.58108
eca-miR-423-3p	AGCUCGGUCUGAGGCCCCUCAGU	chr11	43782481	43782503	+	18024.1	18517.6	15775.1	17598	18797.7	17122.6	18627.8	21165.8	18920.1	21577.4	16188.5	18433.9	17140.2	17037	18489.9	19559.5	20001.9	20206.8	19515	17605.4
eca-miR-423-5p	UGAGGGGCAGAGAGCGAGACUUU	chr11	43782445	43782467	+	4759.57	7177.32	5431.12	5504.06	5213.74	5469.87	5061.31	6386.01	5712.29	6409.95	5024.81	5028.98	5433.76	5401.64	5118.9	5429.82	6556.07	6140.39	6215.65	4499.77
eca-miR-424	CAGCAGCAAUUCAUGUUUUGAA	chrX	106955015	106955036	-	37.9337	27.8289	16.6185	8.57497	30.9795	17.3097	21.96	4.12267	10.4962	29.933	9.30692	8.98995	23.1429	24.745	15.8325	3.10542	15.4933	21.3915	10.3673	7.90542
eca-miR-425	CCAUCGGGAAUAUCGUGUCCGCCC	chr16	38001669	38001692	+	490.907	550.253	624.231	589.529	470.43	575.548	428.698	638.189	483.993	558.037	498.851	551.983	471.536	482.528	507.473	577.608	496.979	542.937	511.766	581.839
eca-miR-429	UAAUACUGUCUGGUAAUGCCG	chr2	48453030	48453050	-	1.1157	0	0	0	0	0	0	0	0	0	0	0	0	0	0	0	0	0	0	0
eca-miR-432	UCUUGGAGUAGGUCAUUGGGUGG	chr24	42748502	42748524	+	0	0	0	0	1.14739	0	0	0	0	0	0	0.898995	0	0	0	0	1.1918	0	0.942478	0
eca-miR-433	AUCAUGAUGGGCUCCUCGGUGU	chr24	42745961	42745982	+	0	0	0	0	0	2.16372	0	0	0	0	0	0.898995	0	0	0	0	0	0	0.942478	0.790542
eca-miR-449a	UGGCAGUGUAUUGUUAGCUGGU	chr21	17151965	17151986	+	7.80988	3.79485	3.11596	6.43123	9.17912	10.8186	9.54785	10.7189	22.1587	23.5188	19.5445	14.3839	40.5001	23.714	29.1651	20.1852	39.3292	36.6712	38.6416	22.9257
eca-miR-449b	AGGCAGUGUGUUGUUAGCUGGCUGC	chr21	17151844	17151868	+	0	0	0	0	0	1.08186	0.954785	0.824533	1.16625	1.06904	0	0	0	4.12417	0	0	1.1918	0	0	0
eca-miR-450a	UUUUGCGAUGUGUUCCUAAUAU	chrX	106948870	106948891	-	184.09	174.563	135.025	50.378	156.045	218.535	81.1567	53.5947	183.101	176.391	97.7227	34.1618	214.072	195.898	91.6619	46.5813	171.619	157.89	97.0753	29.2501
eca-miR-450b-3p	UUGGGAACAUUUUGCAUCCAUA	chrX	106948664	106948685	-	2.2314	0	0	0	0	0	0	0	1.16625	0	0	0	0	0	0	0	0	0	0	0
eca-miR-450b-5p	UUUUGCAAUAUGUUCCUGAAUA	chrX	106948701	106948722	-	180.743	202.392	92.4401	54.6654	142.276	183.916	65.8801	35.4549	192.431	224.498	86.5544	31.4648	182.25	179.402	78.3292	29.5015	200.222	173.169	82.9381	32.4122
eca-miR-450c	UUUUGCGAUGUGUUCCUAAUAC	chrX	106949003	106949024	-	721.856	589.466	262.779	152.206	659.75	564.73	334.175	129.452	564.464	482.136	349.94	172.607	600.751	563.981	283.319	160.705	538.691	542.937	285.571	148.622
eca-miR-451	AAACCGUUACCAUUACUGUGUU	chr11	42750442	42750463	-	466.362	132.82	243.045	262.608	442.893	141.723	151.811	266.324	507.318	144.32	179.624	178.001	575.679	147.439	192.49	215.827	433.813	113.069	184.726	214.237
eca-miR-454	UAGUGCAAUAUUGCUUAUAGGGU	chr11	33283295	33283317	-	85.9087	101.196	115.291	120.05	90.6439	94.1217	92.6141	134.399	85.1361	76.9707	114.475	130.354	81.0001	85.5766	64.9966	111.795	85.8093	93.7152	94.2478	126.487
eca-miR-483	UCACUCCUCUCCUCCCGUCUUCUU	chr12	30634802	30634825	-	69.1733	49.333	83.0923	76.1029	43.6008	50.8473	60.1514	70.0853	48.9824	68.4184	89.3464	60.2327	42.4286	45.3659	74.9961	73.7537	60.7816	62.1373	89.5355	52.1758
eca-miR-485-5p	AGAGGCUGGCCGUGAUGAAUUC	chr24	42925994	42926015	+	0	0	0	0	0	0	0	0.824533	0	0	0	0	0	0	0	0.776354	0	0	0	0
eca-miR-486-3p	CGGGGCAGCUCAGUACAGGAU	chr27	3709614	3709634	+	8.92558	3.79485	4.15461	3.21561	13.7687	0	7.63828	8.24533	16.3275	2.13807	2.79208	8.98995	13.5	2.06209	4.16645	7.76354	16.6851	2.03729	8.48231	6.32434
eca-miR-486-5p	UCCUGUACUGAGCUGCCCCGAG	chr27	3709572	3709593	+	411.692	129.025	148.527	254.033	406.176	85.4668	157.539	257.254	395.358	116.525	178.693	274.193	301.822	77.3283	217.489	234.459	395.676	123.256	217.713	247.44
eca-miR-488	UUGAAAGGCUAUUUCUUGGUC	chr5	12172418	12172438	-	0	0	0	0	0	0	0.954785	0	0	0	0	0	0	0	0	0	0	0	0.942478	0
eca-miR-491-3p	CUUAUGCAAGAUUCCCUUCUAC	chr23	39789403	39789424	+	1.1157	0	1.03865	1.07187	0	0	0.954785	0.824533	2.3325	0	0.930692	0.898995	0.964287	2.06209	0	3.88177	0	1.01864	0	0.790542
eca-miR-491-5p	AGUGGGGAACCCUUCCAUGAGG	chr23	39789369	39789390	+	1.1157	6.32474	4.15461	5.35936	10.3265	3.24557	6.68349	5.77173	9.32999	6.41422	5.58415	6.29296	5.78572	3.09313	3.33316	4.65813	5.95898	8.14915	0.942478	3.95271
eca-miR-494	UGAAACAUACACGGGAAACCUC	chr24	42902218	42902239	+	0	0	0	0	1.14739	1.08186	1.90957	0	0	1.06904	0	0	1.92857	0	0.83329	0	0	0	0	0
eca-miR-495	AAACAAACAUGGUGCACUUCUU	chr24	42906133	42906154	+	3.34709	0	0	1.07187	2.29478	4.32743	1.90957	0.824533	0	1.06904	0	0	2.89286	3.09313	0	3.10542	1.1918	2.03729	0	2.37163
eca-miR-497	CAGCAGCACACUGUGGUUUGU	chr11	50049231	50049251	-	2.2314	2.5299	3.11596	1.07187	4.58956	10.8186	9.54785	1.64907	3.49875	4.27615	4.65346	5.39397	5.78572	11.3415	4.16645	6.21084	2.38359	5.09322	5.65487	3.95271
eca-miR-499-3p	AACAUCACAGCAAGUCUGUGCU	chr22	25813294	25813315	+	0	0	1.03865	1.07187	0	0	0.954785	0	0	0	0	0	0	0	0	0.776354	0	0	0	0
eca-miR-499-5p	UUAAGACUUGCAGUGAUGUUU	chr22	25813257	25813277	+	233.181	252.99	320.944	227.237	212.267	326.721	211.007	230.869	286.897	196.703	394.613	184.294	275.786	281.475	222.488	265.513	308.675	183.356	310.075	189.73
eca-miR-500	UAAUCCUUGCUACCUGGGUGAGA	chrX	40073296	40073318	+	274.462	318.767	252.393	157.565	306.353	267.219	207.188	145.118	221.587	214.876	198.237	183.395	291.215	325.81	190.823	157.6	232.4	280.127	217.713	192.102
		chrX	40075113	40075135	+
eca-miR-501-5p	AUCCUUCGUCCCUGGGUGAGA	chrX	40074580	40074600	+	686.154	635.004	646.042	454.473	758.425	717.272	424.879	375.163	864.19	592.247	648.692	268.799	863.037	558.826	559.137	367.216	699.584	599.981	566.43	324.913
eca-miR-502-3p	AAUGCACCUGGGCAAGGAUUCA	chrX	40077458	40077479	+	1528.51	1352.23	1118.63	866.072	1598.32	1285.25	1369.16	805.569	1363.34	1228.32	1131.72	847.752	1245.86	1142.4	1267.43	779.46	1378.91	1192.83	1067.83	805.562
eca-miR-502-5p	AUCCUUGCUAUCUGGGUGCUA	chrX	40077422	40077442	+	45.7436	64.5124	41.5461	13.9343	28.6848	46.5199	30.5531	12.368	25.6575	34.2092	20.4752	15.2829	25.0715	36.0865	29.1651	12.4217	28.6031	36.6712	45.239	15.8108
eca-miR-503	UAGCAGCGGGAACAGUACUGCAG	chrX	106954660	106954682	-	101.529	80.9567	36.3529	22.5093	83.7595	62.7478	48.694	20.6133	80.4712	84.4539	40.0198	29.6668	65.5715	74.2351	44.9977	20.9616	75.0831	71.3051	33.9292	15.0203
eca-miR-504	AGACCCUGGUCUGCACUCUAUC	chrX	110329602	110329623	-	560.08	382.014	367.683	1771.8	696.466	456.544	655.937	2390.32	720.742	481.067	603.088	2704.18	594.965	425.821	634.967	2255.31	647.145	444.129	631.461	2307.59
eca-miR-505	CGUCAACACUUGCUGGUUUCCU	chrX	111378321	111378342	-	264.42	258.049	340.678	315.13	247.836	316.984	302.667	334.761	251.91	326.056	300.614	219.355	294.108	301.065	264.153	279.488	296.757	322.91	304.421	256.926
eca-miR-506a	UGAAUGGCACCUUUCUGAGUAGAGU	chrX	116755639	116755663	-	0	1.26495	0	0	1.14739	0	0	0	0	0	0	0	0	0	0	0	0	1.01864	0	0
eca-miR-507a	AUUGGCACCUCUUAGAGUGAA	chrX	116755953	116755973	-	0	0	0	0	0	0	0	0	1.16625	0	0	0	0	0	0.83329	0	1.1918	0	0	0.790542
eca-miR-508-3p	UGAUUGUCACCUUUUGGAGUAGA	chrX	116765795	116765817	-	0	0	0	0	0	0	0	0	0	1.06904	0	0	0	1.03104	0	0	0	0	0	0.790542
eca-miR-509a-5p	UACUGCAGACAGUGGCAAUCA	chrX	116788851	116788871	-	0	1.26495	0	1.07187	0	1.08186	0	0	0	0	0.930692	0	0.964287	1.03104	0	0	0	0	0	0
eca-miR-532-3p	CCUCCCACACCCAAGGCUUGCA	chrX	40068515	40068536	+	338.056	302.323	180.726	142.559	313.238	262.892	235.832	126.978	237.915	281.157	202.891	124.96	274.822	245.388	246.654	116.453	269.346	284.202	180.956	134.392
eca-miR-532-5p	CAUGCCUUGAGUGUAGGACCGU	chrX	40068478	40068499	+	19593.9	23906.3	19866.3	12481.9	20653	16582.7	15003.5	13124.1	27497.8	20437.8	14667.7	11596.1	23542.1	19891.9	15542.5	12767.1	25266.1	19578.3	20332.1	10543.5
eca-miR-542-3p	UGUGACAGAUUGAUAACUGAAA	chrX	106949753	106949774	-	27.8924	29.0938	19.7344	4.28749	25.2426	21.6372	18.1409	5.77173	31.4887	18.1736	22.3366	5.39397	30.8572	22.683	9.99948	10.0926	32.1785	19.3542	5.65487	7.90542
eca-miR-542-5p	CUCGGGGAUCAUCAUGUCACGA	chrX	106949791	106949812	-	1.1157	1.26495	0	1.07187	0	2.16372	0	0	3.49875	2.13807	0	0.898995	0	1.03104	1.66658	0	2.38359	0	0	0
eca-miR-543	AAACAUUCGCGGUGCACUUCUU	chr24	42904291	42904312	+	0	0	0	0	3.44217	2.16372	0	2.4736	1.16625	0	0.930692	2.69698	0	2.06209	0.83329	1.55271	3.57539	1.01864	1.88496	0.790542
eca-miR-545	UCAACAAACAUUUAUUGUGUGC	chrX	55500434	55500455	-	2.2314	0	2.07731	2.14374	1.14739	2.16372	0.954785	0	0	0	2.79208	1.79799	2.89286	0	0.83329	0.776354	1.1918	0	0.942478	1.58108
eca-miR-551a	GCGACCCACUCUUGGUUUCCA	chr2	46536588	46536608	+	4.46279	1.26495	6.23192	6.43123	6.88434	3.24557	8.59306	11.5435	2.3325	1.06904	3.72277	10.7879	3.85715	3.09313	9.16619	5.43448	4.76718	4.07458	6.59735	8.69596
eca-miR-582-3p	UAACCGGUUGAACAACUGAACC	chr21	13258923	13258944	+	6.69419	11.3845	12.4638	10.7187	12.6213	16.2279	11.4574	9.8944	8.16374	10.6904	6.51484	8.09095	9.64287	10.3104	9.99948	8.5399	13.1097	18.3356	8.48231	10.277
eca-miR-582-5p	UUACAGUUGUUCAACCAGUUACU	chr21	13258886	13258908	+	7.80988	7.58969	7.27057	4.28749	2.29478	14.0642	10.5026	7.4208	3.49875	7.48326	10.2376	8.09095	5.78572	7.2173	3.33316	4.65813	8.34257	5.09322	5.65487	7.11488
eca-miR-590-3p	UAAUUUUAUGUAUAAGCUAGU	chr13	11703571	11703591	+	131.652	147.999	275.243	203.656	94.086	324.557	185.228	126.978	115.459	162.494	425.326	124.96	202.5	217.55	148.326	153.718	148.974	141.592	180.956	129.649
eca-miR-590-5p	GAGCUUAUUCAUAAAAGUACAG	chr13	11703531	11703552	+	11.157	13.9144	15.5798	4.28749	16.0635	16.2279	13.367	6.59627	10.4962	9.62133	11.1683	11.6869	4.82143	11.3415	6.66632	3.88177	13.1097	10.1864	8.48231	9.48651
eca-miR-592	UUGUGUCAAUAUGCGAUGAUGU	chr4	82406076	82406097	-	0	0	0	0	0	0	0	0	0	0	0	0	0.964287	0	0	0	0	1.01864	0	0
eca-miR-615-3p	UCCGAGCCUGGGUCUCCCUCUC	chr6	70898564	70898585	+	2.2314	5.05979	3.11596	3.21561	1.14739	5.40929	3.81914	5.77173	3.49875	2.13807	5.58415	0.898995	4.82143	8.24835	0.83329	1.55271	4.76718	5.09322	3.76991	1.58108
eca-miR-615-5p	GGGGGUCCCCGGUGCUCGGAUC	chr6	70898521	70898542	+	0	0	0	0	1.14739	0	0	0	0	1.06904	0	0	0	0	0	0	0	0	0	0
eca-miR-628a	AUGCUGACAUAUUUACUAGAGG	chr1	135627767	135627788	+	302.354	198.597	181.764	234.74	287.995	244.5	290.255	213.554	223.92	173.184	277.346	275.092	215.036	195.898	263.32	262.408	197.838	164.002	191.323	290.129
eca-miR-632	GUGCCUGUUUCCUGUGGGA	chr11	40168589	40168607	-	0	0	1.03865	1.07187	1.14739	0	0	0	1.16625	2.13807	0	0	0	1.03104	1.66658	0	0	1.01864	2.82744	0.790542
eca-miR-652	AAUGGCGCCACUAGGGUUGUG	chrX	86921376	86921396	+	1383.47	1566.01	1309.74	1598.16	1378.02	1313.38	1165.79	1771.92	1246.72	1408.99	1100.08	1619.99	1383.75	1486.76	1194.94	1683.14	1238.28	1465.83	1270.46	1615.08
eca-miR-660	UACCCAUUGCAUAUCGGAGUUG	chrX	40076545	40076566	+	1403.55	1462.28	1465.54	907.875	1282.78	1412.91	1124.74	859.164	1355.18	1430.37	1204.32	789.317	1614.22	1342.42	1213.27	865.635	1462.33	1397.58	1274.23	815.84
eca-miR-664	UAUUCAUUUAUCUCCUAGCCUACA	chr30	10420842	10420865	-	53.5535	69.5722	65.4352	68.5998	43.6008	47.6018	54.4227	54.4192	53.6474	74.8326	51.1881	81.8085	53.0358	68.0489	71.6629	51.2394	52.439	62.1373	48.0664	82.2164
eca-miR-671-3p	UCCGGUUCUCAGGGCUCCACC	chr4	102828591	102828611	+	175.165	170.768	133.986	139.343	81.4647	99.5309	82.1115	110.487	123.622	98.3514	72.594	102.485	93.5358	108.26	94.1617	83.8463	89.3846	115.107	85.7655	68.7772
eca-miR-671-5p	AGGAAGCCCUGGAGGGGCUGGAG	chr4	102828552	102828574	+	34.5866	27.8289	17.6571	19.2937	9.17912	25.9646	23.8696	21.4379	12.8287	17.1046	13.9604	14.3839	16.3929	15.4657	13.3326	16.3034	16.6851	20.3729	16.9646	10.277
eca-miR-676	CCGUCCUAAGGUUGUUGAGUU	chrX	51938899	51938919	+	63.5948	45.5381	92.4401	58.9529	72.2856	71.4026	82.1115	88.2251	106.129	73.7636	71.6633	47.6467	106.072	47.428	73.3295	66.7665	92.96	77.4169	86.708	41.1082
eca-miR-703	AAAACCUUCAGAAGGAAAGGA	chr4	34894303	34894323	-	2.2314	1.26495	1.03865	1.07187	2.29478	2.16372	3.81914	1.64907	1.16625	3.20711	0.930692	4.49497	0.964287	2.06209	3.33316	0.776354	4.76718	3.05593	0.942478	0.790542
		chr8	81656606	81656626	+
		chr10	28407025	28407045	-
		chr18	34530009	34530029	-
		chr19	45277196	45277216	-
eca-miR-744	UGCGGGGCUAGGGCUAACAGCAGU	chr11	54402159	54402182	+	1997.1	1907.54	1805.18	1817.89	2574.74	1852.14	2511.08	2238.61	2281.18	2072.86	1973.07	2420.99	1902.54	1776.49	2285.71	2277.82	2144.04	1813.19	1939.62	2280.71
eca-miR-758	UUUGUGACCUGGUCCACUAACC	chr24	42898650	42898671	+	0	0	0	0	0	0	0	0	0	0	0	0	0	0	0	0	0	1.01864	0	0
eca-miR-767-5p	UGCACCAUGGUUGUCUGAGCAUG	chrX	120988506	120988528	-	0	0	0	0	0	0	0.954785	0	0	0	0	0	0.964287	0	0	0	1.1918	0	0	0
eca-miR-770-5p	AGCACCACGUGUCUGGGCCAUG	chr24	42712248	42712269	+	0	0	0	0	0	0	0	0	0	0	0	0	0	0	0	0.776354	0	0	0	0
eca-miR-872	AAGGUUACUUGUUAGUUCAGG	chr23	44847410	44847430	+	710.7	555.312	497.515	484.486	740.067	636.133	796.29	476.58	615.779	476.791	777.128	606.821	637.394	574.291	658.299	628.847	587.555	492.005	523.076	668.799
eca-miR-873	GCAGGAACUUGUGAGUCUCCU	chr23	46420664	46420684	-	6.69419	3.79485	4.15461	2.14374	4.58956	3.24557	1.90957	4.9472	2.3325	3.20711	1.86138	3.59598	5.78572	5.15522	0.83329	7.76354	2.38359	2.03729	0.942478	7.90542
eca-miR-874	CUGCCCUGGCCCGAGGGACCGA	chr14	38723842	38723863	+	2.2314	0	3.11596	0	1.14739	0	0	1.64907	0	0	1.86138	0.898995	1.92857	0	0.83329	1.55271	4.76718	1.01864	1.88496	0
eca-miR-876-3p	UGGUGGUGGUUUACAAAGUAAUUCA	chr23	46400216	46400240	-	0	0	0	0	0	1.08186	0	0.824533	0	0	0.930692	0.898995	0.964287	0	0.83329	0.776354	1.1918	1.01864	0.942478	0
eca-miR-885-5p	UCCAUUACACUACCCUGCCUCU	chr16	6595308	6595329	+	0	0	0	1.07187	0	0	0	0	0	1.06904	0	0	0	0	0	0	0	0	0	0.790542
eca-miR-1180	UUUCCGGCUCGAGUGGGUGUGU	chr11	59216545	59216566	+	180.743	226.426	335.485	379.442	229.478	270.465	252.063	375.987	202.927	272.604	281.069	313.749	204.429	255.699	270.819	340.043	195.454	280.127	313.845	345.467
eca-miR-1248	UCCUUCUUGUAUAAGCACUGUGCUAAA	chr19	24793833	24793859	+	60.2477	108.786	54.01	68.5998	59.6643	54.0929	42.9653	20.6133	27.99	86.592	53.9801	26.9698	58.8215	80.4214	52.4973	27.1724	77.4667	94.7339	45.239	17.3919
eca-miR-1249	AACGCCCUUCCCCCCCUUCUUCA	chr28	41193671	41193693	-	166.239	164.443	144.373	96.4684	126.213	113.595	154.675	57.7173	115.459	141.113	107.03	76.4146	98.3573	125.787	149.159	59.0029	116.796	136.498	105.558	60.8717
eca-miR-1271a	CUUGGCACCUCGUAAGCACUCA	chr14	5745097	5745118	-	692.848	699.516	584.762	757.813	715.972	734.582	823.024	771.763	738.235	856.299	737.108	711.105	683.679	593.881	738.295	718.128	762.749	753.797	705.916	652.988
eca-miR-1271b	UUUGGCACAUGACAAGCACUCA	chr7	44819644	44819665	+	4.46279	5.05979	10.3865	9.64684	5.73695	10.8186	6.68349	9.8944	3.49875	11.7594	5.58415	8.98995	6.75001	4.12417	5.83303	5.43448	5.95898	6.11186	10.3673	7.90542
eca-miR-1291a	UGGCCCUGACUGAAGACCAGCAGU	chr6	66545008	66545031	-	8.92558	10.1196	4.15461	10.7187	6.88434	6.49115	5.72871	4.9472	4.66499	9.62133	2.79208	2.69698	5.78572	6.18626	4.16645	2.32906	8.34257	11.2051	9.42478	4.74325
eca-miR-1291b	AGGCCCUGAAUCAAGACCAGCAGU	chr20	7735175	7735198	-	0	5.05979	2.07731	0	1.14739	2.16372	0	2.4736	0	3.20711	0.930692	0	0.964287	1.03104	1.66658	0	5.95898	9.1678	0.942478	0
eca-miR-1296	UUAGGGCCCUGGCUCCAUCUCC	chr1	52479508	52479529	-	26.7767	37.9485	38.4302	34.2999	40.1587	42.1925	36.2818	20.6133	24.4912	53.4519	23.2673	26.0708	26.0357	36.0865	40.8312	22.5143	36.9457	47.8763	36.7567	25.2973
eca-miR-1301	UUGCAGCUGCCUGGGAGUGAUUUC	chr15	70650512	70650535	+	58.0163	83.4866	124.638	96.4684	65.4013	70.3208	113.619	131.101	69.9749	73.7636	104.238	104.283	78.1072	59.8005	114.161	123.44	73.8913	71.3051	146.084	82.2164
eca-miR-1307	ACUCGGCGUGGCGUCGGUCGUGGUA	chr1	26935160	26935184	+	8887.65	8114.64	9293.87	12164.7	10427.5	8516.39	9934.53	11707.5	10967.4	7947.22	9903.49	11452.3	9555.12	7848.3	9487	12148.4	9367.51	7847.63	9455.89	10539.5
eca-miR-1379	GCACGGGCUGCAGCGCCGACGCCU	chr30	12533313	12533336	+	2316.19	2661.45	1954.75	2051.56	2096.28	1807.78	1801.68	2049.79	2725.52	2092.11	1898.61	1955.31	2247.75	1969.29	2114.06	2059.67	2714.91	1947.65	2212.94	1762.12
eca-miR-1388	AGGACUGUCCAACCUGAGAAUGGU	chr22	49647279	49647302	-	15411.1	18894.5	13177.4	19096.5	16026.8	12654.5	16691.5	16974.7	16675	13870.8	15158.2	25807.4	13984.1	12401.4	14150.1	21730.9	14022.7	12694.3	13903.4	22501.2
eca-miR-1461	AUCUCUACGGGUAAGUGUGUGA	chr15	44358864	44358885	-	3.34709	0	0	1.07187	2.29478	1.08186	0	0	2.3325	1.06904	1.86138	0	0	1.03104	0.83329	0	2.38359	0	0	0
eca-miR-1468	CUCCGUUUGCCUGUUUUGCUG	chrX	46452252	46452272	-	219.792	175.828	109.059	142.559	188.172	122.25	107.891	136.873	187.766	198.841	88.4158	148.334	153.322	169.091	130.827	129.651	174.002	209.841	128.177	117
eca-miR-1543	UUGGUCCUAGUCUGGGUGCAAAC	chr14	37373369	37373391	-	0	3.79485	4.15461	2.14374	3.44217	5.40929	0.954785	1.64907	1.16625	4.27615	0.930692	3.59598	9.64287	4.12417	1.66658	3.10542	11.918	3.05593	8.48231	3.16217
eca-miR-1839	AAGGUAGAUAGAACAGGUCUUG	chr1	91911522	91911543	-	2880.73	4004.83	3128.42	3955.21	3186.3	3668.58	3181.34	4673.45	3688.84	4411.92	3102.93	4069.75	3321.97	3820.02	2880.68	4703.15	3729.13	4177.46	3361.82	3787.49
eca-miR-1842	UGGCUCUGUGAGGUCGGCUCA	chr13	40597869	40597889	+	56.9006	35.4186	67.5125	61.0967	43.6008	19.4734	73.5184	72.5589	57.1462	43.8305	70.7326	62.9296	40.5001	54.6453	56.6637	61.332	33.3703	57.0441	79.1682	67.1961
eca-miR-1902	AGAGGUGCAGUAGGCAUGACUU	chr12	413043	413064	-	1.1157	0	0	0	2.29478	1.08186	0	0.824533	2.3325	0	0.930692	0	1.92857	3.09313	0	0	2.38359	3.05593	1.88496	0.790542
eca-miR-2114	AGCCUCAAGCAAGGGACUUUGA	chrX	119236817	119236838	+	10.0413	17.7093	9.34788	13.9343	6.88434	10.8186	8.59306	11.5435	11.6625	18.1736	6.51484	6.29296	9.64287	7.2173	5.83303	10.869	7.15077	12.2237	8.48231	9.48651
eca-miR-2483	UCUGUCAACCAUCCAGCUGUUUGG	chrX	99522627	99522650	-	46.8593	18.9742	67.5125	148.99	56.2221	19.4734	62.061	243.237	54.8137	31.0021	64.2178	183.395	61.7144	31.9623	74.1628	196.418	56.0144	26.4847	81.9956	151.784
eca-miR-3065	UCAGCACCAGGAUAUUGUUGGGG	chr11	1976413	1976435	-	0	0	1.03865	0	1.14739	0	0	0	0	3.20711	0.930692	0	0.964287	0	0	0	0	0	0	0
eca-miR-3200	CACCUUGCGCUACUCAGGUCUGCU	chr8	6218028	6218051	-	168.47	215.041	162.03	204.727	197.351	175.261	165.178	280.341	204.094	289.709	168.455	324.537	163.929	195.898	139.993	275.606	218.099	275.034	187.553	248.23
eca-miR-3548	CAGCACUGUCCGGUAAGAUGCC	chr2	48454459	48454480	+	14.5041	20.2392	15.5798	20.3656	10.3265	25.9646	13.367	13.1925	11.6625	7.48326	15.8218	13.4849	17.3572	15.4657	16.6658	14.7507	5.95898	18.3356	10.3673	19.7636
eca-miR-3613	ACAAAAAAAAAAGCCCAACCCUU	chr17	21185064	21185086	+	16.7355	12.6495	7.27057	13.9343	6.88434	8.65486	9.54785	3.29813	6.99749	7.48326	10.2376	8.09095	12.5357	12.3725	9.16619	3.88177	8.34257	9.1678	12.2522	7.90542
eca-miR-3958	CAGAUAUUGCACGGUUGAUCUCUU	chr24	42908111	42908134	+	1.1157	0	1.03865	0	1.14739	0	0	0	1.16625	0	0.930692	1.79799	0.964287	2.06209	0	0	1.1918	0	0	0
eca-miR-6529	CCUGUGCCUUUUACCUCUUUAA	chr19	38814163	38814184	+	35.7023	10.1196	21.8117	49.3061	30.9795	14.0642	30.5531	51.9456	31.4887	11.7594	29.7821	64.7276	36.6429	24.745	39.9979	50.463	25.0277	7.13051	38.6416	73.5204
eca-miR-7143	UCUGCACUUGAAGCUGAGCCUG	chr7	6385430	6385451	+	8.92558	10.1196	5.19327	6.43123	16.0635	9.73672	4.77392	11.5435	12.8287	8.5523	7.44554	7.19196	10.6072	10.3104	9.99948	8.5399	11.918	4.07458	8.48231	13.4392
eca-miR-7177b	AAAUGGUCCCCUAGUGCUCUGG	chr13	15364548	15364569	+	273.346	221.366	112.175	136.128	293.732	267.219	148.946	130.276	262.406	273.673	114.475	152.829	281.572	278.382	181.657	144.402	206.181	303.556	149.854	134.392
eca-miR-8914	UUUGAGCUGUGUUGGUUGUCACG	chr20	15497765	15497787	-	24.5454	27.8289	38.4302	25.7249	35.5691	37.865	36.2818	23.9115	22.1587	32.0711	42.8118	25.1719	20.25	26.8071	26.6653	26.396	26.2195	23.4288	26.3894	26.0879
eca-miR-8917	CUUGCCCUUCUUCCUCUGACCUU	chr20	33720992	33721014	-	15.6198	7.58969	13.5025	21.4374	17.2109	14.0642	15.2766	21.4379	13.995	5.34519	17.6832	17.0809	7.7143	13.4036	20.8322	21.7379	16.6851	16.2983	19.792	15.0203
eca-miR-8934	CCCCUGGAGGCCUCUGUACCCCACU	chr12	30929596	30929620	+	0	0	0	0	0	0	0.954785	0	0	0	0	0	0	0	0	0	0	0	0	0
eca-miR-8951	UUUUUGAAGACAUUCCUAGAAUCC	chr23	19174870	19174893	+	26.7767	12.6495	20.7731	25.7249	26.39	22.719	20.0505	10.7189	25.6575	25.6569	27.9208	17.0809	24.1072	27.8382	11.6661	24.067	25.0277	13.2424	16.0221	11.8581
eca-miR-8958	GGAUGAUUGUCCCUUUGCUGCU	chr21	11650863	11650884	-	1.1157	1.26495	4.15461	1.07187	1.14739	1.08186	0.954785	5.77173	0	1.06904	0.930692	6.29296	3.85715	6.18626	2.49987	5.43448	7.15077	3.05593	2.82744	2.37163
eca-miR-8964	AGUGUAGAAUUUAAGGAGAUGCG	chr22	26240798	26240820	+	3.34709	2.5299	2.07731	3.21561	4.58956	9.73672	3.81914	4.12267	3.49875	7.48326	6.51484	5.39397	6.75001	3.09313	8.3329	3.10542	5.95898	5.09322	2.82744	6.32434
eca-miR-8970	GCCUGGGGGCUGUAGUGUCCGCGCC	chr5	51512293	51512317	-	13.3884	24.034	25.9663	27.8687	21.8004	12.9823	21.0053	23.0869	15.1612	19.2427	24.198	25.1719	15.4286	16.4967	20.8322	22.5143	14.3015	19.3542	16.0221	19.7636
eca-miR-8971	UCCUGAGUGUGUACUGUGCGGGCGU	chr5	93960521	93960545	+	0	0	0	0	0	0	0.954785	0.824533	0	0	0	0.898995	0.964287	0	0.83329	0.776354	0	0	0	0
eca-miR-8976	CCCGCUGUGGGUCUCACUCCACU	chr6	9098598	9098620	+	2.2314	5.05979	0	7.5031	1.14739	1.08186	0.954785	4.12267	4.66499	4.27615	2.79208	1.79799	3.85715	4.12417	3.33316	3.10542	3.57539	4.07458	2.82744	4.74325
eca-miR-8977	AGUGAGGCGAGGGUAUGACUCUAC	chr6	39985050	39985073	-	1.1157	0	0	0	1.14739	1.08186	0	1.64907	1.16625	1.06904	0.930692	0	0.964287	1.03104	0.83329	0.776354	0	0	0.942478	0
eca-miR-8982	CACCCGGGGUAGGACUUCAGCA	chr7	3149052	3149073	+	0	1.26495	0	0	0	0	0	0	0	0	0	0	0	0	0	0.776354	0	0	0	0
eca-miR-8985	UACUUUUUGGUCUGAGUGCGUCC	chr7	402982	403004	+	3.34709	5.05979	1.03865	2.14374	2.29478	3.24557	0.954785	2.4736	6.99749	4.27615	6.51484	6.29296	3.85715	4.12417	6.66632	0	3.57539	7.13051	6.59735	2.37163
eca-miR-8986a	UAGUGUGCUAGAGUCCUCGAAGAG	chr7	78085274	78085297	+	87.0244	69.5722	62.3192	127.553	106.707	76.8119	73.5184	150.065	110.794	76.9707	82.8316	180.698	77.143	82.4835	55.8304	161.482	69.1241	63.1559	81.9956	195.264
eca-miR-8986b	UGGUGUGCUAGAGUCCUCGGAGA	chr7	78086664	78086686	+	8.92558	7.58969	5.19327	18.2218	6.88434	9.73672	16.2313	12.368	3.49875	8.5523	5.58415	9.88894	8.67858	6.18626	10.8328	12.4217	5.95898	14.261	9.42478	11.8581
eca-miR-8992	CGCGCUGCAGGCUGCGCCCGGGGA	chr7	44932200	44932223	+	12.2727	5.05979	2.07731	11.7906	5.73695	4.32743	5.72871	14.0171	11.6625	6.41422	4.65346	8.98995	12.5357	5.15522	9.99948	6.98719	14.3015	7.13051	10.3673	9.48651
eca-miR-8996	UGCGGACCCGAGCGGACGCCGGACG	chr7	2709921	2709945	+	0	0	0	0	0	0	0	0	0	0	0	0	0	0	0	0	0	1.01864	0	0
eca-miR-8997	UUGCGGACAAGGGAAGCCCCAG	chr7	44761791	44761812	+	1.1157	0	0	1.07187	1.14739	0	1.90957	0.824533	0	0	0	0	0	0	0	0	0	0	0	0
eca-miR-9004	ACAGUGUUAGCUCAGUGACAGU	chr8	33968031	33968052	-	0	0	0	0	0	3.24557	0	0	0	0	0	0	0	0	0	0	1.1918	0	0	0.790542
eca-miR-9018	AUUUUCUGCGACUAAUUUUUCA	chr28	41770276	41770297	-	1.1157	1.26495	1.03865	6.43123	2.29478	3.24557	1.90957	2.4736	2.3325	2.13807	9.30692	1.79799	6.75001	4.12417	2.49987	2.32906	5.95898	4.07458	5.65487	3.16217
eca-miR-9021	CUGCUGCCGAGAGUUGUUCACUGU	chr28	45276622	45276645	-	102.644	112.58	85.1696	129.696	86.0543	89.7942	93.5689	132.75	123.622	116.525	98.6534	115.97	105.107	88.6697	90.8286	114.9	104.878	95.7525	111.212	112.257
eca-miR-9027	GAGCUGGCCAAUGAGUUGUCG	chr26	26164990	26165010	+	8.92558	7.58969	5.19327	13.9343	5.73695	5.40929	9.54785	8.24533	4.66499	4.27615	4.65346	12.5859	8.67858	6.18626	7.49961	10.0926	10.7262	9.1678	6.59735	11.8581
eca-miR-9030	AAACAGGGUUGAGUAACUUCC	chr26	2468473	2468493	-	0	0	0	0	0	0	0	0	0	0	0	0	0	0	0	0	0	0	0.942478	0
eca-miR-9032	UGCAGAUUCCGUUGAUACUAAGUGG	chr25	2529362	2529386	-	0	0	0	0	0	0	0	0	0	0	0	0	0.964287	0	0	0	0	0	0	0
eca-miR-9035	UGUGGUUGUGGCAUUUUCCCCGGGG	chr25	36177840	36177864	-	0	0	0	0	0	0	0	0	0	0	0	0	0	0	0.83329	0	0	0	0	0
eca-miR-9036	ACUGCACUGACCUGGGGUGAGU	chr25	35569944	35569965	-	0	2.5299	1.03865	2.14374	2.29478	2.16372	1.90957	1.64907	0	3.20711	0	0.898995	0.964287	2.06209	2.49987	1.55271	2.38359	2.03729	0	3.16217
eca-miR-9040	ACUGUCCUACCGGAUGCCAGUAGC	chr25	38044757	38044780	+	52.4378	74.632	61.2805	68.5998	47.043	76.8119	46.7845	49.472	50.1487	70.5564	53.9801	68.3236	49.1786	87.6387	46.6642	66.7665	38.1374	81.4915	59.3761	70.3583
eca-miR-9041	AAUUCAACCAACCGUGGAUUGU	chr25	27673516	27673537	-	2.2314	0	2.07731	2.14374	0	0	0	0	0	0	0	0	0	0	0.83329	0	1.1918	1.01864	0	0
eca-miR-9045	GAGCAGCAUGCUAGGUACCAAGUUG	chr1	108538350	108538374	+	0	0	0	0	0	1.08186	0	0	0	0	0	0	0	0	0	0.776354	0	0	0	0
eca-miR-9047	UGUUCCCGGCUGACCCUGGCUAGG	chr1	162054122	162054145	+	1.1157	2.5299	0	0	0	1.08186	0	0.824533	1.16625	2.13807	0.930692	2.69698	0.964287	1.03104	0.83329	0	0	0	0	0.790542
eca-miR-9048	CCAUCUGCAGUUGGCUGAGCCC	chr1	40605675	40605696	-	0	0	1.03865	1.07187	1.14739	1.08186	0	1.64907	1.16625	0	0	0	0.964287	0	0.83329	0	0	1.01864	0	0.790542
eca-miR-9055	AGAGAGCACCAAGGGAGCUGCGU	chr1	92819771	92819793	+	155.082	130.29	112.175	170.428	130.803	110.35	121.258	237.466	155.111	151.803	113.544	206.769	112.822	117.539	127.493	215.827	172.81	159.927	118.752	241.115
eca-miR-9060	UGAGCACGCUGAUGUCUGCUGC	chr2	33632021	33632042	-	8.92558	8.85464	18.6958	19.2937	11.4739	12.9823	10.5026	14.0171	11.6625	5.34519	6.51484	16.1819	14.4643	12.3725	8.3329	16.3034	14.3015	16.2983	7.53983	18.973
eca-miR-9063	UCCGAGAGCUGCUAUCUGAGAGA	chr2	44648706	44648728	+	0	1.26495	0	0	0	0	0.954785	0	0	0	0	0	0	0	0	0	0	3.05593	0	0
eca-miR-9065	UGGGACUGAGCCUGUAGGGGCCAGC	chr2	28386835	28386859	+	0	0	0	0	0	0	0	0	0	0	0	0	0	1.03104	0	0	0	0	0	0
eca-miR-9068	AUCGUGAUCACGGGCAUCUGGCGCU	chr3	32455775	32455799	-	0	0	0	0	0	0	0	0	1.16625	0	0	0	0	0	0.83329	0	0	0	0	0
eca-miR-9072	UAAAGCCUGGAAAUCUGCAGCU	chr3	1799724	1799745	-	0	0	0	1.07187	0	1.08186	0.954785	0.824533	1.16625	2.13807	0	0.898995	0.964287	1.03104	0.83329	3.10542	0	2.03729	0.942478	1.58108
eca-miR-9080	AUCCGAGGUUGGUUGAAUCUGU	chr29	10893754	10893775	+	2.2314	1.26495	5.19327	4.28749	1.14739	3.24557	4.77392	0.824533	3.49875	0	4.65346	0.898995	3.85715	3.09313	1.66658	0.776354	3.57539	2.03729	8.48231	0.790542
eca-miR-9081	UUAGACAAUACUGAUGCCUGGGC	chr4	44747074	44747096	-	0	0	0	1.07187	0	0	0	0	0	0	0	0	0	0	0	0	0	0	0	0
eca-miR-9085	CUUAAUGAAAAGGCUUAUCAAA	chr10	50687455	50687476	-	0	0	1.03865	0	0	0	0.954785	0.824533	0	0	0.930692	0	0	0	0	0	0	0	0.942478	0
eca-miR-9086	CUUGUCUGACCUCUCUCCCUGCAG	chr10	24329503	24329526	-	4.46279	0	1.03865	0	0	2.16372	0.954785	0.824533	4.66499	3.20711	0	0	0	2.06209	0.83329	2.32906	1.1918	0	1.88496	1.58108
eca-miR-9089	UCACAGACAAGAACUCCCAGGGUGG	chr10	26190995	26191019	+	0	0	0	0	0	0	0	0	0	0	0	0	0	0	0	0	0	0	0	0.790542
		chr10	26231013	26231037	+
eca-miR-9093	CUGUAGUCCAUGUCCCCAGGCCC	chr10	27647462	27647484	+	0	0	0	0	1.14739	0	0	0	0	0	0	0.898995	0	0	0	0	0	0	0	0
eca-miR-9094	UCACCCGUGUCCUUUCUCUGCCUAG	chr10	15397881	15397905	+	4.46279	6.32474	5.19327	6.43123	4.58956	3.24557	2.86435	4.12267	8.16374	7.48326	5.58415	7.19196	3.85715	7.2173	4.16645	3.10542	5.95898	4.07458	5.65487	8.69596
eca-miR-9097	CCGAAGGGCUGGCAGGGAUUGGGA	chr11	7319326	7319349	+	34.5866	39.2134	27.005	15.0062	37.8639	28.1283	33.4175	16.4907	27.99	28.864	23.2673	9.88894	52.0715	62.8936	53.3305	12.4217	39.3292	49.9136	29.2168	9.48651
eca-miR-9098	UGACCUUGGUCGGGACGUAGUGAAC	chr11	980029	980053	+	0	1.26495	0	0	0	0	0	0.824533	0	0	0	0	0	0	0	0	0	0	0	0.790542
eca-miR-9101	UUGUGUCUGAGUGUACGCCUUGC	chr11	7397312	7397334	-	0	0	0	0	0	0	0	0	0	0	0	0	0.964287	0	0	0	0	0	0	0
eca-miR-9104	CUGACCUGAGGCCUCUGCUGCA	chr11	5692526	5692547	+	3.34709	1.26495	5.19327	9.64684	1.14739	3.24557	2.86435	4.9472	3.49875	2.13807	2.79208	4.49497	5.78572	3.09313	4.99974	5.43448	3.57539	3.05593	0	7.11488
eca-miR-9105	UCUGAGACUUCGGCAUUGGGU	chr11	6266938	6266958	+	2.2314	3.79485	1.03865	3.21561	1.14739	5.40929	3.81914	0	2.3325	5.34519	1.86138	4.49497	2.89286	4.12417	4.16645	3.10542	3.57539	3.05593	0	3.16217
eca-miR-9112	AGGCCAUGAUGCUCUCUGAGCCUG	chr12	25073434	25073457	+	0	1.26495	0	0	0	0	0	0	1.16625	0	0	0.898995	0	2.06209	0	0	1.1918	1.01864	1.88496	0
eca-miR-9114	AGGGCCUCACCAUUCUAGCUCU	chr12	12241010	12241031	+	0	1.26495	0	0	0	0	0	0	0	0	0	0	0	0	0.83329	0	0	0	0	0
eca-miR-9115	ACGUGAGAACUGAAGUGCAGGGAC	chr12	20718885	20718908	-	0	0	0	0	0	0	0	1.64907	0	0	0	0	0	0	0	0	0	0	0	0
eca-miR-9116	UUUAUGUCUCAUAUCUCUGUG	chr12	20724800	20724820	-	0	0	0	0	0	0	0	0.824533	0	1.06904	0	0	0	0	0	0	0	0	0	0
eca-miR-9118	UCACAAUUCCCACGGACUCCAGAUA	chr12	3391381	3391405	-	0	0	0	1.07187	0	0	0	0	0	0	0	0	0	0	0	0	0	0	0	0
eca-miR-9120	UCAGUCUCCCUCUCUCUGCAG	chr12	33079865	33079885	+	2.2314	3.79485	0	6.43123	2.29478	3.24557	1.90957	5.77173	1.16625	3.20711	0.930692	4.49497	2.89286	1.03104	0.83329	1.55271	2.38359	2.03729	2.82744	3.95271
eca-miR-9126	UUUUACUCGUUGGUGAGCUCCU	chr30	9272002	9272023	+	0	0	0	0	0	0	0	0	0	0	0	0	0	0	0	0.776354	0	0	0	0
eca-miR-9130	CUUCCUCUGACAGGUACCCAGA	chr13	19979008	19979029	+	0	0	0	0	0	0	0	0.824533	0	0	0	0	0	0	0	0.776354	0	0	0	0
eca-miR-9133	UGUGGAGAGAGAUGAUCUGGCA	chr13	8689455	8689476	-	1.1157	0	0	0	1.14739	0	0.954785	1.64907	0	0	0	0.898995	1.92857	0	0.83329	0	0	1.01864	0.942478	0.790542
eca-miR-9137	UGUGUUCCUAGCCUCUGGCCUCU	chr13	19076106	19076128	-	0	0	0	1.07187	0	0	0	0	0	0	0	0	0	0	0	0	0	0	0	0
eca-miR-9149	UCUUAAGGAUCAUGGACAGUGCCCU	chr15	28930816	28930840	-	0	0	0	0	0	0	0	0	0	0	0	0	0	0	0.83329	0	0	0	0	0
a-miR-9150	UCUUGGAAACAGCCACUGUAGAAUG	chr15	28903054	28903078	-	0	0	0	1.07187	0	0	0	0	0	0	0	0	0	0	0	0	0	0	0	0
eca-miR-9151	UGCCGGCUGUGCAGUGGGAGCUGG	chr15	8373051	8373074	+	4.46279	3.79485	0	3.21561	8.03173	4.32743	3.81914	2.4736	4.66499	6.41422	5.58415	6.29296	5.78572	3.09313	2.49987	2.32906	2.38359	4.07458	0.942478	3.95271
eca-miR-9156	UCUAGGGCGCCUGUGAAGAUGGU	chr14	26942966	26942988	+	883.633	870.284	0	1.07187	959.218	814.639	0.954785	0.824533	1072.95	953.581	0.930692	0	823.501	813.493	0	3.10542	889.079	866.866	0	3.16217
eca-miR-9159	UCCUCUUUCUUUGCUUCCUUCU	chr14	47671910	47671931	+	10.0413	6.32474	10.3865	18.2218	11.4739	9.73672	11.4574	45.3493	6.99749	6.41422	19.5445	35.0608	5.78572	8.24835	6.66632	38.8177	14.3015	8.14915	15.0797	33.9933
eca-miR-9160	UCCAAGAGCCUGUUAUCGUGCU	chr14	47959221	47959242	-	3.34709	1.26495	1.03865	3.21561	4.58956	2.16372	2.86435	1.64907	1.16625	3.20711	0	2.69698	1.92857	2.06209	0.83329	1.55271	1.1918	1.01864	1.88496	3.95271
eca-miR-9162	CCCUGCAGAUGACUGGACUCCA	chr14	34117788	34117809	-	1.1157	0	1.03865	0	3.44217	1.08186	1.90957	1.64907	1.16625	1.06904	0.930692	0	0.964287	3.09313	1.66658	0.776354	0	0	0	0
eca-miR-9163	UGCCCCAAGAAGCCUGGACUUGUG	chr17	78381249	78381272	+	11.157	12.6495	15.5798	19.2937	12.6213	14.0642	11.4574	18.9643	17.4937	16.0356	13.9604	17.0809	15.4286	16.4967	9.16619	26.396	7.15077	21.3915	25.4469	22.1352
eca-miR-9174	CAGUUGACUGACACUUGAGCGCU	chr16	39817149	39817171	+	4.46279	1.26495	1.03865	4.28749	2.29478	4.32743	4.77392	3.29813	3.49875	4.27615	2.79208	2.69698	3.85715	3.09313	5.83303	3.88177	3.57539	2.03729	2.82744	3.16217
eca-miR-9177	GAGCAGUGGGUGCAGACAGGC	chr19	35753116	35753136	+	6.69419	0	4.15461	16.0781	9.17912	4.32743	9.54785	29.6832	3.49875	3.20711	5.58415	30.5658	4.82143	2.06209	7.49961	39.5941	7.15077	5.09322	14.1372	30.8311
eca-miR-9178	UAGGCUGUGGGCUGCAUUUGGC	chr19	18788770	18788791	+	5.57849	0	0	0	6.88434	1.08186	0.954785	0	0	3.20711	0	2.69698	0.964287	3.09313	0	5.43448	2.38359	3.05593	0.942478	2.37163
eca-miR-9179	GUCAUGGGUGGACUUCCUGCUAA	chr19	53789317	53789339	-	17.8512	12.6495	15.5798	17.1499	13.7687	11.9004	7.63828	13.1925	5.83124	16.0356	14.8911	17.0809	16.3929	6.18626	17.4991	17.0798	17.8769	10.1864	9.42478	8.69596
eca-miR-9180	CUUGGACCUCUGAUGGGAGCCCA	chr19	33436594	33436616	+	2.2314	2.5299	1.03865	3.21561	5.73695	2.16372	5.72871	4.12267	9.32999	0	6.51484	7.19196	3.85715	3.09313	4.16645	6.98719	7.15077	2.03729	2.82744	1.58108
eca-miR-9185	AUCCGCGGAUUGAACCAGCCACGUA	chr18	54706002	54706026	-	30.1238	36.6835	19.7344	21.4374	40.1587	25.9646	31.5079	32.9813	39.6525	29.933	34.4356	25.1719	30.8572	36.0865	27.4986	30.2778	45.2882	34.6339	29.2168	26.8784

## Sheet: B. Normfinder stability results
Normfinder stability analysis for candidate endogenous controls using expression data from Illumina high throughput sequencing.
Only miNAs with normalized expression > 1 in all samples have been included. The pair of endogenous controls used in this study are highlighted.
Other miRNAs such as miR-148b-5p, miR-423-3p and members of the let-7 groups may be worthy of consideration for use in future studies.
	GroupDif	GroupSD	Stability
eca-miR-148b-5p	0.05	0.13	0.09
eca-let-7c	0.08	0.13	0.1
eca-miR-423-3p	0.09	0.13	0.11
eca-let-7d	0.08	0.15	0.11
eca-let-7a	0.1	0.16	0.12
eca-miR-106b	0.33	0.11	0.12
eca-miR-29a	0.21	0.15	0.12
eca-miR-30c	0.17	0.13	0.12
eca-miR-139-5p	0.18	0.18	0.13
eca-miR-30e	0.22	0.15	0.13
eca-miR-1271a	0.18	0.12	0.13
eca-miR-26a	0.1	0.18	0.13
eca-miR-103	0.12	0.16	0.13
eca-miR-191a	0.21	0.15	0.14
eca-miR-150	0.28	0.15	0.14
eca-miR-374b	0.18	0.13	0.14
eca-miR-423-5p	0.14	0.19	0.14
eca-miR-505	0.18	0.18	0.14
eca-miR-186	0.29	0.16	0.14
eca-miR-148b-3p	0.18	0.16	0.14
eca-miR-128	0.2	0.18	0.14
eca-miR-361-3p	0.13	0.2	0.14
eca-miR-107b	0.29	0.15	0.14
eca-miR-192	0.3	0.2	0.14
eca-miR-140-3p	0.14	0.17	0.15
eca-miR-107a	0.13	0.19	0.15
eca-miR-93	0.29	0.12	0.15
eca-miR-425	0.26	0.18	0.15
eca-miR-1379	0.26	0.18	0.15
eca-miR-27a	0.07	0.22	0.15
eca-miR-25	0.35	0.13	0.15
eca-miR-221	0.11	0.22	0.15
eca-miR-21	0.34	0.12	0.15
eca-miR-744	0.25	0.16	0.15
eca-miR-340-3p	0.18	0.18	0.15
eca-let-7f	0.16	0.22	0.16
eca-let-7g	0.15	0.22	0.16
eca-miR-101	0.24	0.21	0.16
eca-miR-363	0.17	0.21	0.16
eca-miR-98	0.2	0.22	0.16
eca-miR-16	0.42	0.16	0.16
eca-miR-1839	0.1	0.26	0.17
eca-miR-29c	0.2	0.24	0.17
eca-miR-330	0.27	0.2	0.17
eca-miR-92a	0.17	0.22	0.17
eca-miR-1307	0.18	0.23	0.17
eca-miR-652	0.21	0.23	0.17
eca-miR-9021	0.22	0.21	0.17
eca-miR-30d	0.09	0.25	0.17
eca-miR-106a	0.26	0.2	0.17
eca-miR-20a	0.21	0.21	0.17
eca-miR-17	0.31	0.19	0.17
eca-miR-197	0.43	0.21	0.18
eca-miR-872	0.23	0.23	0.18
eca-miR-29b	0.38	0.23	0.18
eca-miR-15b	0.29	0.17	0.18
eca-miR-19b	0.35	0.21	0.18
eca-miR-140-5p	0.27	0.25	0.19
eca-miR-15a	0.37	0.26	0.19
eca-miR-7	0.25	0.27	0.19
eca-miR-200c	0.27	0.24	0.19
eca-miR-9185	0.38	0.29	0.2
eca-miR-190b	0.36	0.27	0.2
eca-miR-92b	0.27	0.32	0.2
eca-miR-342-3p	0.57	0.27	0.2
eca-miR-628a	0.37	0.29	0.2
eca-miR-181a	0.23	0.29	0.21
eca-miR-28-3p	0.27	0.29	0.21
eca-miR-374a	0.44	0.3	0.21
eca-miR-345-3p	0.34	0.26	0.21
eca-miR-340-5p	0.21	0.31	0.21
eca-miR-499-5p	0.16	0.34	0.21
eca-miR-99a	0.32	0.31	0.21
eca-miR-182	0.55	0.27	0.22
eca-miR-10a	0.2	0.34	0.22
eca-miR-454	0.45	0.3	0.22
eca-miR-142-3p	0.4	0.33	0.22
eca-miR-331	0.08	0.37	0.22
eca-miR-30b	0.26	0.34	0.22
eca-miR-378	0.24	0.33	0.22
eca-miR-660	0.27	0.34	0.22
eca-miR-502-3p	0.21	0.33	0.22
eca-miR-326	0.37	0.32	0.22
eca-miR-142-5p	0.42	0.31	0.23
eca-miR-34a	0.64	0.33	0.23
eca-miR-1388	0.23	0.34	0.23
eca-miR-1180	0.1	0.38	0.23
eca-miR-361-5p	0.15	0.38	0.23
eca-miR-342-5p	0.3	0.37	0.23
eca-miR-125b-5p	0.34	0.33	0.23
eca-miR-181b	0.24	0.36	0.23
eca-miR-664	0.51	0.29	0.23
eca-miR-500	0.3	0.37	0.23
eca-miR-18a	0.37	0.34	0.23
eca-miR-324-5p	0.38	0.32	0.24
eca-miR-148a	0.43	0.35	0.24
eca-miR-1468	0.26	0.39	0.24
eca-miR-9040	0.3	0.38	0.24
eca-miR-8914	0.44	0.29	0.24
eca-miR-19a	0.37	0.34	0.24
eca-miR-20b	0.4	0.33	0.24
eca-miR-296	0.17	0.43	0.25
eca-miR-3200	0.39	0.36	0.25
eca-miR-194	0.52	0.38	0.25
eca-miR-483	0.37	0.36	0.25
eca-miR-28-5p	0.42	0.39	0.25
eca-miR-8970	0.44	0.37	0.25
eca-miR-345-5p	0.48	0.34	0.25
eca-miR-196b	0.18	0.42	0.25
eca-miR-532-5p	0.25	0.42	0.26
eca-miR-9055	0.31	0.42	0.26
eca-miR-676	0.28	0.42	0.26
eca-miR-324-3p	0.64	0.25	0.26
eca-miR-362-5p	0.5	0.4	0.26
eca-miR-146a	0.81	0.23	0.26
eca-miR-99b	0.18	0.47	0.26
eca-miR-1301	0.08	0.47	0.26
eca-miR-32	0.34	0.42	0.27
eca-miR-1296	0.27	0.43	0.27
eca-miR-193a-5p	0.42	0.44	0.27
eca-miR-582-3p	0.66	0.35	0.27
eca-miR-126-5p	0.45	0.46	0.27
eca-miR-350	0.5	0.43	0.27
eca-let-7e	0.25	0.45	0.27
eca-miR-183	0.51	0.39	0.27
eca-miR-9a	0.23	0.47	0.28
eca-miR-10b	0.39	0.47	0.28
eca-miR-188-5p	0.37	0.45	0.28
eca-miR-501-5p	0.31	0.5	0.29
eca-miR-9163	0.28	0.54	0.29
eca-miR-151-5p	0.46	0.49	0.29
eca-miR-33a	0.56	0.48	0.29
eca-miR-1842	0.42	0.54	0.29
eca-miR-122	1.44	0.35	0.3
eca-miR-671-3p	1.25	0.24	0.3
eca-miR-100	0.52	0.44	0.3
eca-miR-2114	0.81	0.48	0.3
eca-miR-532-3p	0.26	0.53	0.31
eca-miR-7143	0.41	0.54	0.31
eca-miR-149	0.22	0.56	0.31
eca-miR-1249	0.77	0.49	0.31
eca-miR-8951	0.69	0.48	0.31
eca-miR-9060	0.82	0.56	0.31
eca-miR-126-3p	0.55	0.51	0.31
eca-miR-7177b	0.27	0.55	0.31
eca-miR-9027	0.77	0.52	0.31
eca-miR-671-5p	1.03	0.42	0.32
eca-miR-195	0.67	0.55	0.32
eca-miR-129b-5p	0.52	0.58	0.32
eca-miR-3613	1.02	0.54	0.32
eca-miR-31	0.49	0.56	0.32
eca-miR-590-3p	0.42	0.58	0.32
eca-miR-365	0.92	0.44	0.33
eca-miR-3548	0.68	0.51	0.33
eca-miR-8917	0.54	0.58	0.33
eca-miR-1271b	0.68	0.55	0.33
eca-miR-590-5p	1.33	0.57	0.33
eca-miR-9094	1.01	0.38	0.33
eca-miR-130b	0.86	0.47	0.33
eca-miR-8986a	0.38	0.6	0.34
eca-miR-9174	0.87	0.6	0.34
eca-miR-125a-5p	0.62	0.59	0.34
eca-miR-9179	0.71	0.55	0.35
eca-miR-141	0.8	0.57	0.35
eca-miR-129a-5p	0.43	0.64	0.35
eca-miR-139-3p	1.07	0.56	0.35
eca-miR-34c	0.9	0.55	0.35
eca-miR-582-5p	0.69	0.68	0.35
eca-miR-96	1.44	0.46	0.36
eca-miR-8986b	0.97	0.62	0.36
eca-miR-1291a	0.96	0.61	0.36
eca-miR-8964	1.33	0.56	0.38
eca-miR-187	0.87	0.68	0.38
eca-miR-155	1.58	0.3	0.38
eca-miR-199b-3p	0.49	0.72	0.39
eca-miR-362-3p	1.58	0.58	0.39
eca-miR-200b	0.57	0.81	0.4
eca-miR-502-5p	0.89	0.72	0.4
eca-miR-8992	0.74	0.75	0.4
eca-miR-193b	3.87	0.44	0.41
eca-miR-138	0.76	0.76	0.42
eca-miR-497	1.91	0.74	0.42
eca-miR-199b-5p	0.85	0.76	0.42
eca-miR-451	0.35	0.78	0.42
eca-miR-1248	1.07	0.76	0.43
eca-miR-199a-3p	0.54	0.79	0.43
eca-miR-129a-3p	0.51	0.8	0.43
eca-miR-486-5p	0.33	0.8	0.43
eca-miR-9097	0.91	0.82	0.43
eca-miR-328	0.88	0.8	0.44
eca-miR-9018	1.38	0.84	0.47
eca-miR-144	1.31	0.9	0.47
eca-miR-503	0.51	0.9	0.47
eca-miR-450c	0.2	0.92	0.48
eca-miR-211	0.23	0.95	0.48
eca-miR-491-5p	1.08	0.9	0.49
eca-miR-703	0.84	0.93	0.5
eca-miR-551a	1.18	0.95	0.5
eca-miR-873	0.8	0.98	0.5
eca-miR-6529	0.66	0.99	0.51
eca-miR-129b-3p	1.11	0.99	0.51
eca-miR-449a	3.21	0.39	0.52
eca-miR-146b-5p	2.08	0.91	0.53
eca-miR-450a	0.46	1.02	0.53
eca-miR-615-3p	0.59	1.05	0.53
eca-miR-424	0.99	1.04	0.54
eca-miR-9159	0.6	1.04	0.54
eca-miR-542-3p	0.55	1.07	0.55
eca-miR-199a-5p	0.69	1.06	0.56
eca-miR-504	0.59	1.08	0.56
eca-miR-184	0.95	1.1	0.58
eca-miR-450b-5p	0.54	1.14	0.59
eca-miR-2483	0.39	1.21	0.62
eca-miR-146b-3p	2.25	1.18	0.64
eca-miR-95	0.57	1.46	0.73
eca-miR-132	9.58	0.44	0.83
eca-miR-338-5p	0.85	1.67	0.84
eca-miR-130a	0.7	1.84	0.93
