# Supplementary material for: Characterization of basal and lipopolysaccharide-induced microRNA expression in equine peripheral blood mononuclear cells using Next-Generation Sequencing
Source: PLoS One. 2017 May 26;12(5):e0177664. doi: 10.1371/journal.pone.0177664 (PMC5446123; doi:10.1371/journal.pone.0177664)
Supplement: S3 File — A: miR-155 target predictions generated by TargetScan. B: Target predictions for eca-miR-155 generated using RNA22, from a list of 51 candidate genes with experimental evidence in other species. C: Statistical over-representation analysis of Gene Ontology biological function terms for TargetScan miR-155 target predictions. (XLSX) [file pone.0177664.s004.xlsx]

## Sheet: A. TargetScan predictions
Human ortholog of target gene	Gene name	Total context+ score	Aggregate PCT	Conserved sites				Poorly conserved sites
				total	8mer	7mer-m8	7mer-1A	total	8mer	7mer-m8	7mer-1A
SLC12A6	solute carrier family 12 (potassium/chloride transporters), member 6	-0.51	0.34	1	0	1	0	2	1	1	0
JARID2	jumonji, AT rich interactive domain 2	-0.46	0.74	2	2	0	0	0	0	0	0
CAP2	CAP, adenylate cyclase-associated protein, 2 (yeast)	-0.45	0.13	1	1	0	0	1	1	0	0
TSHZ3	teashirt zinc finger homeobox 3	-0.44	0.81	1	1	0	0	2	0	0	2
GCFC1	GC-rich sequence DNA-binding factor 1	-0.43	0.32	1	1	0	0	1	0	1	0
C2orf80	chromosome 2 open reading frame 80	-0.41	0.34	1	1	0	0	0	0	0	0
ZNF192	zinc finger protein 192	-0.41	0.36	1	0	1	0	2	0	2	0
SMAD2	SMAD family member 2	-0.41	0.84	2	1	0	1	1	0	0	1
IRF2BP2	interferon regulatory factor 2 binding protein 2	-0.41	0.55	1	1	0	0	0	0	0	0
RREB1	ras responsive element binding protein 1	-0.39	0.69	2	1	0	1	1	0	1	0
MYO1D	myosin ID	-0.39	0.63	1	1	0	0	0	0	0	0
TLE4	transducin-like enhancer of split 4 (E(sp1) homolog, Drosophila)	-0.39	0.56	1	1	0	0	0	0	0	0
LRP1B	low density lipoprotein receptor-related protein 1B	-0.39	0.37	2	1	1	0	0	0	0	0
NFE2L2	nuclear factor (erythroid-derived 2)-like 2	-0.38	0.1	1	1	0	0	0	0	0	0
PCDH9	protocadherin 9	-0.37	< 0.1	1	1	0	0	1	1	0	0
MBNL3	muscleblind-like 3 (Drosophila)	-0.37	0.13	1	1	0	0	3	0	0	3
HERC4	hect domain and RLD 4	-0.36	0.48	1	1	0	0	0	0	0	0
ARID2	AT rich interactive domain 2 (ARID, RFX-like)	-0.36	0.67	2	1	1	0	0	0	0	0
C1GALT1	core 1 synthase, glycoprotein-N-acetylgalactosamine 3-beta-galactosyltransferase, 1	-0.36	0.47	1	1	0	0	3	1	1	1
MBTD1	mbt domain containing 1	-0.36	0.34	1	1	0	0	0	0	0	0
ZNF652	zinc finger protein 652	-0.35	0.82	3	1	2	0	0	0	0	0
GCNT1	glucosaminyl (N-acetyl) transferase 1, core 2	-0.35	0.11	1	1	0	0	1	0	1	0
FXR1	fragile X mental retardation, autosomal homolog 1	-0.35	0.38	2	1	1	0	1	0	0	1
STC2	stanniocalcin 2	-0.35	< 0.1	1	1	0	0	0	0	0	0
C3orf18	chromosome 3 open reading frame 18	-0.34	0.55	1	1	0	0	0	0	0	0
TRIM32	tripartite motif containing 32	-0.34	0.54	1	1	0	0	0	0	0	0
SALL1	sal-like 1 (Drosophila)	-0.33	0.57	2	1	0	1	0	0	0	0
OTUB2	OTU domain, ubiquitin aldehyde binding 2	-0.33	0.48	1	1	0	0	0	0	0	0
ANKFY1	ankyrin repeat and FYVE domain containing 1	-0.33	0.58	2	1	0	1	0	0	0	0
EHF	ets homologous factor	-0.33	0.55	1	0	0	1	1	0	1	0
CEBPB	CCAAT/enhancer binding protein (C/EBP), beta	-0.33	0.65	1	1	0	0	0	0	0	0
ATXN1L	ataxin 1-like	-0.33	0.28	1	1	0	0	0	0	0	0
FBXO22	F-box protein 22	-0.33	0.11	1	1	0	0	0	0	0	0
ZIC3	Zic family member 3	-0.33	0.64	2	1	1	0	0	0	0	0
C10orf26	chromosome 10 open reading frame 26	-0.33	0.47	1	1	0	0	0	0	0	0
BOC	Boc homolog (mouse)	-0.33	0.33	1	1	0	0	0	0	0	0
PSIP1	PC4 and SFRS1 interacting protein 1	-0.32	0.28	1	1	0	0	0	0	0	0
ANKRD6	ankyrin repeat domain 6	-0.32	< 0.1	1	1	0	0	0	0	0	0
TTL	tubulin tyrosine ligase	-0.32	0.55	1	1	0	0	1	0	0	1
RIF1	RAP1 interacting factor homolog (yeast)	-0.32	< 0.1	1	1	0	0	0	0	0	0
GNAS	GNAS complex locus	-0.32	< 0.1	1	1	0	0	0	0	0	0
GDF6	growth differentiation factor 6	-0.32	0.55	1	1	0	0	0	0	0	0
UBE2Q2	ubiquitin-conjugating enzyme E2Q family member 2	-0.32	< 0.1	1	1	0	0	0	0	0	0
GPM6B	glycoprotein M6B	-0.31	0.26	1	1	0	0	0	0	0	0
BRAP	BRCA1 associated protein	-0.31	0.55	1	0	0	1	1	1	0	0
RNF123	ring finger protein 123	-0.3	0.61	1	1	0	0	0	0	0	0
PTPN2	protein tyrosine phosphatase, non-receptor type 2	-0.3	0.56	1	1	0	0	0	0	0	0
FBXL17	F-box and leucine-rich repeat protein 17	-0.3	0.15	1	1	0	0	1	0	1	0
ACTA1	actin, alpha 1, skeletal muscle	-0.3	0.55	1	1	0	0	0	0	0	0
SLC2A12	solute carrier family 2 (facilitated glucose transporter), member 12	-0.3	0.62	1	1	0	0	0	0	0	0
KIAA1274	KIAA1274	-0.3	0.55	1	1	0	0	0	0	0	0
PLD5	phospholipase D family, member 5	-0.3	0.32	1	0	1	0	1	0	1	0
VMA21	VMA21 vacuolar H+-ATPase homolog (S. cerevisiae)	-0.3	0.11	1	1	0	0	0	0	0	0
AAK1	AP2 associated kinase 1	-0.3	0.33	1	1	0	0	1	0	0	1
DYNC1I1	dynein, cytoplasmic 1, intermediate chain 1	-0.3	0.29	1	1	0	0	0	0	0	0
MPEG1	macrophage expressed 1	-0.29	0.59	2	1	0	1	0	0	0	0
UBL4A	ubiquitin-like 4A	-0.29	0.55	1	1	0	0	0	0	0	0
CSRNP2	cysteine-serine-rich nuclear protein 2	-0.29	0.29	2	2	0	0	0	0	0	0
C10orf46	chromosome 10 open reading frame 46	-0.29	0.7	2	0	1	1	3	1	2	0
H3F3A	H3 histone, family 3A	-0.29	0.28	1	1	0	0	0	0	0	0
DHX40	DEAH (Asp-Glu-Ala-His) box polypeptide 40	-0.28	0.26	1	1	0	0	0	0	0	0
FAM177A1	family with sequence similarity 177, member A1	-0.28	0.57	1	0	0	1	1	1	0	0
EN2	engrailed homeobox 2	-0.28	0.41	1	1	0	0	0	0	0	0
SMAD1	SMAD family member 1	-0.28	< 0.1	1	1	0	0	0	0	0	0
USP43	ubiquitin specific peptidase 43	-0.28	< 0.1	1	1	0	0	0	0	0	0
CARHSP1	calcium regulated heat stable protein 1, 24kDa	-0.28	0.55	1	1	0	0	0	0	0	0
CREG1	cellular repressor of E1A-stimulated genes 1	-0.28	0.28	1	0	1	0	0	0	0	0
DET1	de-etiolated homolog 1 (Arabidopsis)	-0.28	0.42	2	1	1	0	0	0	0	0
ZBTB38	zinc finger and BTB domain containing 38	-0.27	0.29	1	1	0	0	0	0	0	0
USP14	ubiquitin specific peptidase 14 (tRNA-guanine transglycosylase)	-0.27	0.28	1	0	1	0	1	0	1	0
SGK3	serum/glucocorticoid regulated kinase family, member 3	-0.27	0.28	1	1	0	0	0	0	0	0
C8orf44-SGK3	C8orf44-SGK3 readthrough	-0.27	0.28	1	1	0	0	0	0	0	0
FUT9	fucosyltransferase 9 (alpha (1,3) fucosyltransferase)	-0.27	0.23	1	1	0	0	2	0	1	1
WWC1	WW and C2 domain containing 1	-0.27	0.28	1	1	0	0	0	0	0	0
C1orf185	chromosome 1 open reading frame 185	-0.27	< 0.1	1	1	0	0	0	0	0	0
SGIP1	SH3-domain GRB2-like (endophilin) interacting protein 1	-0.27	< 0.1	1	1	0	0	0	0	0	0
COL21A1	collagen, type XXI, alpha 1	-0.27	0.26	1	1	0	0	0	0	0	0
PKN2	protein kinase N2	-0.27	0.2	1	1	0	0	1	0	0	1
SDCBP	syndecan binding protein (syntenin)	-0.27	0.28	1	0	1	0	1	0	1	0
FOS	FBJ murine osteosarcoma viral oncogene homolog	-0.26	0.49	1	1	0	0	0	0	0	0
TMEM33	transmembrane protein 33	-0.26	0.32	1	0	1	0	2	0	1	1
LSM14A	LSM14A, SCD6 homolog A (S. cerevisiae)	-0.26	0.46	1	1	0	0	0	0	0	0
BSDC1	BSD domain containing 1	-0.26	0.34	1	1	0	0	0	0	0	0
RICTOR	RPTOR independent companion of MTOR, complex 2	-0.26	0.62	2	1	0	1	0	0	0	0
IGDCC4	immunoglobulin superfamily, DCC subclass, member 4	-0.26	0.48	1	0	1	0	1	0	1	0
RPS6KA3	ribosomal protein S6 kinase, 90kDa, polypeptide 3	-0.26	0.32	1	0	1	0	1	1	0	0
IAPP	islet amyloid polypeptide	-0.26	< 0.1	1	1	0	0	0	0	0	0
ERI1	exoribonuclease 1	-0.26	< 0.1	1	1	0	0	0	0	0	0
BAG5	BCL2-associated athanogene 5	-0.26	0.14	1	1	0	0	1	0	0	1
MAP3K14	mitogen-activated protein kinase kinase kinase 14	-0.25	0.62	1	1	0	0	0	0	0	0
FAM135A	family with sequence similarity 135, member A	-0.25	< 0.1	1	1	0	0	0	0	0	0
TCEB1	transcription elongation factor B (SIII), polypeptide 1 (15kDa, elongin C)	-0.25	0.28	1	1	0	0	0	0	0	0
BNC2	basonuclin 2	-0.25	0.33	1	1	0	0	2	1	1	0
ZNF518B	zinc finger protein 518B	-0.25	0.33	1	0	1	0	1	0	0	1
ZPLD1	zona pellucida-like domain containing 1	-0.25	0.14	1	1	0	0	0	0	0	0
TRAF3	TNF receptor-associated factor 3	-0.25	0.28	1	0	1	0	1	0	1	0
TOMM20	translocase of outer mitochondrial membrane 20 homolog (yeast)	-0.25	0.59	1	1	0	0	0	0	0	0
TRAPPC10	trafficking protein particle complex 10	-0.25	0.28	1	0	1	0	0	0	0	0
CSF1R	colony stimulating factor 1 receptor	-0.25	0.55	1	1	0	0	0	0	0	0
TMPRSS11BNL	TMPRSS11B N terminal-like	-0.25	0.16	1	1	0	0	1	0	1	0
HBP1	HMG-box transcription factor 1	-0.25	0.28	1	1	0	0	0	0	0	0
RORA	RAR-related orphan receptor A	-0.24	0.32	1	0	1	0	1	0	1	0
MLYCD	malonyl-CoA decarboxylase	-0.24	0.3	1	1	0	0	0	0	0	0
ZNF236	zinc finger protein 236	-0.24	0.18	1	1	0	0	0	0	0	0
SOX11	SRY (sex determining region Y)-box 11	-0.24	0.28	1	0	1	0	0	0	0	0
KDM5B	lysine (K)-specific demethylase 5B	-0.24	0.61	1	1	0	0	0	0	0	0
KDM2A	lysine (K)-specific demethylase 2A	-0.24	0.28	1	1	0	0	0	0	0	0
MR1	major histocompatibility complex, class I-related	-0.24	0.43	1	1	0	0	0	0	0	0
BDH1	3-hydroxybutyrate dehydrogenase, type 1	-0.24	< 0.1	1	1	0	0	0	0	0	0
RBAK	RB-associated KRAB zinc finger	-0.23	0.22	1	1	0	0	0	0	0	0
LRRC8B	leucine rich repeat containing 8 family, member B	-0.23	0.1	1	1	0	0	0	0	0	0
WNK3	WNK lysine deficient protein kinase 3	-0.23	0.32	1	0	1	0	1	0	1	0
PRKAR1A	protein kinase, cAMP-dependent, regulatory, type I, alpha (tissue specific extinguisher 1)	-0.23	0.28	1	1	0	0	0	0	0	0
MAP3K10	mitogen-activated protein kinase kinase kinase 10	-0.23	0.24	1	1	0	0	0	0	0	0
RELA	v-rel reticuloendotheliosis viral oncogene homolog A (avian)	-0.23	0.53	1	1	0	0	0	0	0	0
MSR1	macrophage scavenger receptor 1	-0.23	< 0.1	1	1	0	0	0	0	0	0
TMEM202	transmembrane protein 202	-0.23	0.12	1	1	0	0	0	0	0	0
SLC33A1	solute carrier family 33 (acetyl-CoA transporter), member 1	-0.23	< 0.1	1	1	0	0	0	0	0	0
MS4A1	membrane-spanning 4-domains, subfamily A, member 1	-0.22	0.28	1	0	1	0	0	0	0	0
CLDN1	claudin 1	-0.22	0.28	1	0	1	0	0	0	0	0
OGN	osteoglycin	-0.22	0.28	1	0	1	0	0	0	0	0
S1PR3	sphingosine-1-phosphate receptor 3	-0.22	< 0.1	1	1	0	0	0	0	0	0
RCOR1	REST corepressor 1	-0.22	0.64	2	0	1	1	0	0	0	0
ODZ3	odz, odd Oz/ten-m homolog 3 (Drosophila)	-0.22	< 0.1	1	1	0	0	0	0	0	0
UPP2	uridine phosphorylase 2	-0.22	0.54	1	1	0	0	0	0	0	0
MYBL1	v-myb myeloblastosis viral oncogene homolog (avian)-like 1	-0.22	0.16	1	1	0	0	0	0	0	0
CHD9	chromodomain helicase DNA binding protein 9	-0.21	< 0.1	1	1	0	0	0	0	0	0
E2F2	E2F transcription factor 2	-0.21	0.68	2	1	0	1	1	1	0	0
TERF1	telomeric repeat binding factor (NIMA-interacting) 1	-0.21	0.28	1	0	1	0	0	0	0	0
UQCR11	ubiquinol-cytochrome c reductase, complex III subunit XI	-0.21	0.52	1	1	0	0	0	0	0	0
ITK	IL2-inducible T-cell kinase	-0.21	0.28	1	1	0	0	1	0	1	0
KRAS	v-Ki-ras2 Kirsten rat sarcoma viral oncogene homolog	-0.21	0.28	1	0	1	0	1	0	1	0
WDR45	WD repeat domain 45	-0.21	0.28	1	1	0	0	0	0	0	0
PHC3	polyhomeotic homolog 3 (Drosophila)	-0.21	0.33	2	1	1	0	1	0	1	0
G3BP2	GTPase activating protein (SH3 domain) binding protein 2	-0.21	0.28	1	0	1	0	0	0	0	0
AICDA	activation-induced cytidine deaminase	-0.2	0.55	1	1	0	0	0	0	0	0
KLHL8	kelch-like 8 (Drosophila)	-0.2	0.28	1	0	1	0	1	0	1	0
WEE1	WEE1 homolog (S. pombe)	-0.2	0.55	1	1	0	0	0	0	0	0
SKIV2L2	superkiller viralicidic activity 2-like 2 (S. cerevisiae)	-0.2	0.28	1	0	1	0	0	0	0	0
USP45	ubiquitin specific peptidase 45	-0.2	0.28	1	0	1	0	0	0	0	0
MIER3	mesoderm induction early response 1, family member 3	-0.2	0.28	1	0	1	0	0	0	0	0
TRIM23	tripartite motif containing 23	-0.2	< 0.1	1	1	0	0	0	0	0	0
SP1	Sp1 transcription factor	-0.2	0.58	1	0	0	1	2	1	1	0
NUDT4	nudix (nucleoside diphosphate linked moiety X)-type motif 4	-0.2	0.28	1	1	0	0	0	0	0	0
GLT25D1	glycosyltransferase 25 domain containing 1	-0.2	< 0.1	1	1	0	0	0	0	0	0
YOD1	YOD1 OTU deubiquinating enzyme 1 homolog (S. cerevisiae)	-0.19	0.28	1	1	0	0	0	0	0	0
BACH1	BTB and CNC homology 1, basic leucine zipper transcription factor 1	-0.19	0.51	2	1	1	0	1	0	1	0
FBXO11	F-box protein 11	-0.19	0.33	1	0	1	0	1	0	0	1
USP8	ubiquitin specific peptidase 8	-0.19	0.28	1	0	1	0	0	0	0	0
PARD3B	par-3 partitioning defective 3 homolog B (C. elegans)	-0.19	0.58	2	1	0	1	0	0	0	0
DNAJB1	DnaJ (Hsp40) homolog, subfamily B, member 1	-0.19	0.54	1	1	0	0	0	0	0	0
ZNF248	zinc finger protein 248	-0.19	0.24	1	1	0	0	0	0	0	0
SH3PXD2A	SH3 and PX domains 2A	-0.19	0.58	1	0	0	1	2	1	1	0
IKBKE	inhibitor of kappa light polypeptide gene enhancer in B-cells, kinase epsilon	-0.19	0.48	2	0	2	0	0	0	0	0
SP3	Sp3 transcription factor	-0.19	0.28	1	0	1	0	1	0	0	1
ZNF618	zinc finger protein 618	-0.19	0.75	2	1	1	0	0	0	0	0
MAP4K4	mitogen-activated protein kinase kinase kinase kinase 4	-0.19	0.65	1	0	0	1	1	0	0	1
KCTD3	potassium channel tetramerisation domain containing 3	-0.19	0.28	1	0	1	0	0	0	0	0
C18orf1	chromosome 18 open reading frame 1	-0.18	0.28	1	1	0	0	1	0	1	0
SPTY2D1	SPT2, Suppressor of Ty, domain containing 1 (S. cerevisiae)	-0.18	0.58	1	0	0	1	1	0	1	0
FGF7	fibroblast growth factor 7	-0.18	0.85	2	1	0	1	0	0	0	0
SPI1	spleen focus forming virus (SFFV) proviral integration oncogene spi1	-0.18	0.28	1	1	0	0	0	0	0	0
BRD1	bromodomain containing 1	-0.18	0.28	1	0	1	0	0	0	0	0
TAB2	TGF-beta activated kinase 1/MAP3K7 binding protein 2	-0.17	0.39	1	1	0	0	0	0	0	0
RAPH1	Ras association (RalGDS/AF-6) and pleckstrin homology domains 1	-0.17	0.6	1	1	0	0	0	0	0	0
ATP2B3	ATPase, Ca++ transporting, plasma membrane 3	-0.17	0.28	1	0	1	0	0	0	0	0
SOCS1	suppressor of cytokine signaling 1	-0.17	0.52	1	1	0	0	0	0	0	0
S1PR1	sphingosine-1-phosphate receptor 1	-0.17	0.28	1	0	1	0	0	0	0	0
FAM133A	family with sequence similarity 133, member A	-0.17	< 0.1	1	1	0	0	0	0	0	0
SAMD12	sterile alpha motif domain containing 12	-0.17	0.28	1	0	1	0	0	0	0	0
STRN3	striatin, calmodulin binding protein 3	-0.17	0.28	1	0	1	0	0	0	0	0
CLCN5	chloride channel 5	-0.17	0.28	1	0	1	0	0	0	0	0
RBMS3	RNA binding motif, single stranded interacting protein 3	-0.16	0.74	2	1	1	0	2	0	1	1
FAM104A	family with sequence similarity 104, member A	-0.16	0.28	1	0	1	0	0	0	0	0
RAB11FIP2	RAB11 family interacting protein 2 (class I)	-0.16	0.47	1	1	0	0	0	0	0	0
AGL	amylo-alpha-1, 6-glucosidase, 4-alpha-glucanotransferase	-0.16	0.28	1	0	1	0	1	0	1	0
DMTF1	cyclin D binding myb-like transcription factor 1	-0.16	0.28	1	1	0	0	0	0	0	0
CBL	Cas-Br-M (murine) ecotropic retroviral transforming sequence	-0.16	0.67	1	1	0	0	1	0	1	0
SLC35F5	solute carrier family 35, member F5	-0.16	0.28	1	0	1	0	0	0	0	0
BTBD3	BTB (POZ) domain containing 3	-0.16	0.28	1	0	1	0	0	0	0	0
KLHL5	kelch-like 5 (Drosophila)	-0.16	0.38	1	0	1	0	3	0	1	2
KSR1	kinase suppressor of ras 1	-0.16	0.66	1	1	0	0	1	0	1	0
DCLRE1A	DNA cross-link repair 1A	-0.15	0.28	1	0	1	0	0	0	0	0
TP53INP1	tumor protein p53 inducible nuclear protein 1	-0.15	0.64	1	1	0	0	0	0	0	0
VPS18	vacuolar protein sorting 18 homolog (S. cerevisiae)	-0.15	0.54	1	1	0	0	0	0	0	0
ILF3	interleukin enhancer binding factor 3, 90kDa	-0.15	0.28	1	0	1	0	0	0	0	0
SATB1	SATB homeobox 1	-0.15	0.28	1	0	1	0	0	0	0	0
PODN	podocan	-0.15	0.28	1	0	1	0	0	0	0	0
TBC1D15	TBC1 domain family, member 15	-0.15	0.8	2	0	0	2	0	0	0	0
VPS37C	vacuolar protein sorting 37 homolog C (S. cerevisiae)	-0.15	0.14	1	1	0	0	0	0	0	0
GAB3	GRB2-associated binding protein 3	-0.15	0.55	1	0	0	1	0	0	0	0
ZMYM2	zinc finger, MYM-type 2	-0.15	0.54	1	0	1	0	1	0	0	1
BRWD1	bromodomain and WD repeat domain containing 1	-0.15	0.32	1	0	1	0	1	0	1	0
NRG3	neuregulin 3	-0.15	0.55	1	0	0	1	0	0	0	0
TCF7L2	transcription factor 7-like 2 (T-cell specific, HMG-box)	-0.15	< 0.1	1	1	0	0	0	0	0	0
SIRT1	sirtuin 1	-0.14	0.28	1	0	1	0	1	0	1	0
PHC2	polyhomeotic homolog 2 (Drosophila)	-0.14	0.5	1	1	0	0	0	0	0	0
FGF9	fibroblast growth factor 9 (glia-activating factor)	-0.14	0.55	1	1	0	0	0	0	0	0
FAM91A1	family with sequence similarity 91, member A1	-0.14	0.6	1	0	0	1	2	0	1	1
CAB39	calcium binding protein 39	-0.14	0.44	1	1	0	0	0	0	0	0
STX16	syntaxin 16	-0.14	0.28	1	0	1	0	0	0	0	0
GSK3B	glycogen synthase kinase 3 beta	-0.14	0.55	1	0	0	1	0	0	0	0
RCN2	reticulocalbin 2, EF-hand calcium binding domain	-0.14	0.28	1	0	1	0	0	0	0	0
RRAGB	Ras-related GTP binding B	-0.14	0.48	1	0	0	1	0	0	0	0
MEIS1	Meis homeobox 1	-0.14	0.28	1	1	0	0	0	0	0	0
PITPNM3	PITPNM family member 3	-0.14	0.28	1	0	1	0	0	0	0	0
TRIM44	tripartite motif containing 44	-0.13	0.62	1	1	0	0	0	0	0	0
ACTR10	actin-related protein 10 homolog (S. cerevisiae)	-0.13	0.49	1	0	0	1	0	0	0	0
MYO10	myosin X	-0.13	0.65	1	1	0	0	0	0	0	0
ETS1	v-ets erythroblastosis virus E26 oncogene homolog 1 (avian)	-0.13	0.64	2	2	0	0	0	0	0	0
KCTD7	potassium channel tetramerisation domain containing 7	-0.13	0.58	1	0	0	1	1	0	0	1
RSPO2	R-spondin 2	-0.13	0.55	1	0	0	1	0	0	0	0
C11orf45	chromosome 11 open reading frame 45	-0.13	0.54	1	0	0	1	0	0	0	0
SLA	Src-like-adaptor	-0.13	0.28	1	0	1	0	0	0	0	0
ARL5B	ADP-ribosylation factor-like 5B	-0.13	0.28	1	0	1	0	0	0	0	0
C4orf44	chromosome 4 open reading frame 44	-0.13	< 0.1	1	1	0	0	0	0	0	0
CTTNBP2NL	CTTNBP2 N-terminal like	-0.13	0.27	1	1	0	0	2	1	0	1
BDNF	brain-derived neurotrophic factor	-0.13	0.55	1	0	0	1	0	0	0	0
EPAS1	endothelial PAS domain protein 1	-0.13	0.48	1	1	0	0	0	0	0	0
BAIAP2L1	BAI1-associated protein 2-like 1	-0.13	0.28	1	0	1	0	0	0	0	0
LNX2	ligand of numb-protein X 2	-0.13	< 0.1	1	1	0	0	0	0	0	0
EHD1	EH-domain containing 1	-0.13	0.55	1	0	0	1	0	0	0	0
CHAF1A	chromatin assembly factor 1, subunit A (p150)	-0.13	0.28	1	0	1	0	0	0	0	0
DNAJB7	DnaJ (Hsp40) homolog, subfamily B, member 7	-0.13	0.28	1	0	1	0	0	0	0	0
HIVEP2	human immunodeficiency virus type I enhancer binding protein 2	-0.13	0.57	1	1	0	0	0	0	0	0
IL6R	interleukin 6 receptor	-0.13	0.48	1	1	0	0	0	0	0	0
RHEB	Ras homolog enriched in brain	-0.13	0.55	1	0	0	1	0	0	0	0
OLFML3	olfactomedin-like 3	-0.13	0.55	1	0	0	1	0	0	0	0
PDE7A	phosphodiesterase 7A	-0.13	0.28	1	0	1	0	0	0	0	0
RAB6A	RAB6A, member RAS oncogene family	-0.13	0.28	1	0	1	0	0	0	0	0
KIAA1267	KIAA1267	-0.12	0.55	1	0	0	1	0	0	0	0
CHCHD7	coiled-coil-helix-coiled-coil-helix domain containing 7	-0.12	0.55	1	0	0	1	0	0	0	0
VTI1A	vesicle transport through interaction with t-SNAREs homolog 1A (yeast)	-0.12	0.55	1	0	0	1	0	0	0	0
ATP6V1G1	ATPase, H+ transporting, lysosomal 13kDa, V1 subunit G1	-0.12	0.55	1	0	0	1	0	0	0	0
TTC28	tetratricopeptide repeat domain 28	-0.12	0.55	1	0	0	1	0	0	0	0
NOVA1	neuro-oncological ventral antigen 1	-0.12	0.28	1	0	1	0	0	0	0	0
BCORL1	BCL6 corepressor-like 1	-0.12	0.28	1	0	1	0	0	0	0	0
SCN1A	sodium channel, voltage-gated, type I, alpha subunit	-0.12	0.28	1	0	1	0	0	0	0	0
C7orf71	chromosome 7 open reading frame 71	-0.12	0.28	1	0	1	0	0	0	0	0
EYA2	eyes absent homolog 2 (Drosophila)	-0.12	0.52	1	0	0	1	0	0	0	0
SLCO4C1	solute carrier organic anion transporter family, member 4C1	-0.12	0.28	1	0	1	0	0	0	0	0
C14orf147	chromosome 14 open reading frame 147	-0.12	0.28	1	0	1	0	0	0	0	0
CARD11	caspase recruitment domain family, member 11	-0.12	0.55	1	0	0	1	0	0	0	0
LPCAT2	lysophosphatidylcholine acyltransferase 2	-0.12	0.28	1	0	1	0	0	0	0	0
CD274	CD274 molecule	-0.11	0.55	1	0	0	1	0	0	0	0
C10orf12	chromosome 10 open reading frame 12	-0.11	0.51	1	0	0	1	0	0	0	0
INADL	InaD-like (Drosophila)	-0.11	0.61	1	0	0	1	2	0	1	1
PDS5A	PDS5, regulator of cohesion maintenance, homolog A (S. cerevisiae)	-0.11	0.28	1	0	1	0	0	0	0	0
MID2	midline 2	-0.11	0.55	1	0	0	1	0	0	0	0
FGF13	fibroblast growth factor 13	-0.11	0.49	1	0	0	1	0	0	0	0
JHDM1D	jumonji C domain containing histone demethylase 1 homolog D (S. cerevisiae)	-0.11	0.6	2	1	0	1	0	0	0	0
SUFU	suppressor of fused homolog (Drosophila)	-0.11	0.55	1	0	0	1	0	0	0	0
NGEF	neuronal guanine nucleotide exchange factor	-0.11	0.55	1	0	0	1	0	0	0	0
SEPT11	septin 11	-0.11	0.28	1	0	1	0	0	0	0	0
ZFP3	zinc finger protein 3 homolog (mouse)	-0.11	0.28	1	1	0	0	0	0	0	0
IMP5	intramembrane protease 5	-0.11	0.55	1	0	0	1	0	0	0	0
C1QL2	complement component 1, q subcomponent-like 2	-0.11	0.53	1	0	0	1	0	0	0	0
PIK3R1	phosphoinositide-3-kinase, regulatory subunit 1 (alpha)	-0.11	0.28	1	0	1	0	0	0	0	0
C12orf23	chromosome 12 open reading frame 23	-0.11	0.28	1	0	1	0	0	0	0	0
C9orf69	chromosome 9 open reading frame 69	-0.11	0.55	1	0	0	1	0	0	0	0
TALDO1	transaldolase 1	-0.11	0.48	1	0	0	1	0	0	0	0
SLC39A10	solute carrier family 39 (zinc transporter), member 10	-0.11	< 0.1	1	1	0	0	0	0	0	0

## Sheet: B. RNA22 target predictions
RNA22 binding site predictions for eca-miR-155. 51 mRNAs with experimental evidence of miR-155 targeting in humans and mice were screened. Candidate targets had annotated functions in toll-like receptor signaling pathways, T- and B-lymphocyte function, leukocyte transendothelial migration or cytokine production and signaling. ‘Folding energy’ indicates the free energy change resulting from format…
Genes with statistically significant mRNA-miRNA binding sites
Gene	Starting position on mRNA	Folding energy (Kcal/mol)	Heteroduplex structure	P-value
AKT1	1766	-12	GCC-AGGTCGGGAGGAGAATTGT	0.02
			:|| :||: || || |||:
			TGGGGATAGTGCTAATCGTAATT
CTNND1	5054 (+ 2 other sites at p>0.05)	-14	TCCCCT-TC-C-CTATGCATTGA	0.0095
			||||| || | |||||:|
			TGGGGATAGTGCTAATCGTAATT
GSK3B	4019	-13.6	ATTCCTAAAGGGAATGGCTTTGA	0.03
			|::|||| : || |:|| ||:|
			TGGGGATAGTGCTAATCGTAATT
NFAT5	2745 (+ 1 other site at p>0.05)	-14.4	ACTTCTCATATGATGAGTGCATTAT	0.025
			||::|| :|:||| ||||||
			TGGGGATAGTGCTA--ATCGTAATT
TAB2	534	-13	GACTCTAACGC--ACAGCATTAG	0.023
			|:||| |:| |||||||:
			TGGGGATAGTGCTAATCGTAATT
Genes with binding sites identified but p>0.05
CBL (3 sites), CD81, FOS, MyD88, NFKB1 (2 sites), PAK2, PDK1, PIK3R1, PPP5C, RAP1B, RHOA, TGM2,VAV2
Genes with no miRNA binding site identified
ADAM10, ALDH1A2, CARD11, CCL2, CDK4, CEBPB, CLDN1, CTLA4, CTNNA1, CTNNB1, FADD, ICAM1, IKBKE, IL2, IL6, IL8, INIPP5D, ITK, JUN (AP-1), KRAS, KYNU, MAPK14, MAP3K14, NOS3, NUP62, PIK3CA, RAC1, SELE, SOCS1, SOCS3, STAT3, TICAM2, VCAM1

## Sheet: C. GO over-representation test
Statistical over-representation test for annotated biological processes associated with predicted miR-155 target genes. Only those processes with p<0.05 are shown.
Analysis Type:	PANTHER Overrepresentation Test (release 20160715)
Annotation Version and Release Date:	GO Ontology database Released 2016-08-22
Analyzed List:	miR-155 Target Genes (Equus caballus)
Reference List:	Equus caballus (all genes in database)
Bonferroni correction:	TRUE
GO biological process complete	Equus caballus - Reference Gene List (20374)	miR-155 target genes (231)	miR-155 target genes (expected hits)	Over / under-represented	Fold Enrichment	P-value (Bonferroni adjusted)
organ growth (GO:0035265)	52	7	0.59	+	11.87	0.0181
transcription from RNA polymerase II promoter (GO:0006366)	408	18	4.63	+	3.89	0.0086
protein modification by small protein conjugation or removal (GO:0070647)	566	21	6.42	+	3.27	0.0169
positive regulation of transcription from RNA polymerase II promoter (GO:0045944)	842	28	9.55	+	2.93	0.00292
positive regulation of signal transduction (GO:0009967)	1005	31	11.39	+	2.72	0.00333
positive regulation of nucleic acid-templated transcription (GO:1903508)	1081	33	12.26	+	2.69	0.00173
positive regulation of transcription, DNA-templated (GO:0045893)	1081	33	12.26	+	2.69	0.00173
positive regulation of RNA biosynthetic process (GO:1902680)	1085	33	12.3	+	2.68	0.00188
positive regulation of RNA metabolic process (GO:0051254)	1118	33	12.68	+	2.6	0.00365
regulation of cell differentiation (GO:0045595)	1098	32	12.45	+	2.57	0.00724
regulation of transcription from RNA polymerase II promoter (GO:0006357)	1449	42	16.43	+	2.56	0.000133
positive regulation of gene expression (GO:0010628)	1287	37	14.59	+	2.54	0.0013
positive regulation of cell communication (GO:0010647)	1079	31	12.23	+	2.53	0.0145
positive regulation of signaling (GO:0023056)	1085	31	12.3	+	2.52	0.0163
positive regulation of response to stimulus (GO:0048584)	1324	37	15.01	+	2.46	0.00259
positive regulation of macromolecule biosynthetic process (GO:0010557)	1220	34	13.83	+	2.46	0.00869
positive regulation of cellular biosynthetic process (GO:0031328)	1286	35	14.58	+	2.4	0.0101
positive regulation of nucleobase-containing compound metabolic process (GO:0045935)	1256	34	14.24	+	2.39	0.0164
regulation of developmental process (GO:0050793)	1641	44	18.61	+	2.36	0.000541
positive regulation of biosynthetic process (GO:0009891)	1306	35	14.81	+	2.36	0.0143
cellular protein modification process (GO:0006464)	2038	54	23.11	+	2.34	1.83e-05
protein modification process (GO:0036211)	2038	54	23.11	+	2.34	1.83e-05
positive regulation of nitrogen compound metabolic process (GO:0051173)	1315	34	14.91	+	2.28	0.0437
regulation of transcription, DNA-templated (GO:0006355)	2442	62	27.69	+	2.24	4.46e-06
macromolecule modification (GO:0043412)	2184	55	24.76	+	2.22	7.43e-05
regulation of nucleic acid-templated transcription (GO:1903506)	2480	62	28.12	+	2.2	8.19e-06
regulation of RNA biosynthetic process (GO:2001141)	2485	62	28.17	+	2.2	8.87e-06
regulation of RNA metabolic process (GO:0051252)	2585	64	29.31	+	2.18	5.91e-06
positive regulation of cellular metabolic process (GO:0031325)	2111	52	23.93	+	2.17	0.000427
positive regulation of metabolic process (GO:0009893)	2239	55	25.39	+	2.17	0.000174
positive regulation of macromolecule metabolic process (GO:0010604)	2124	52	24.08	+	2.16	0.00052
regulation of nucleobase-containing compound metabolic process (GO:0019219)	2820	68	31.97	+	2.13	4.34e-06
regulation of multicellular organismal process (GO:0051239)	1875	45	21.26	+	2.12	0.00823
regulation of cellular macromolecule biosynthetic process (GO:2000112)	2710	65	30.73	+	2.12	1.5e-05
regulation of macromolecule biosynthetic process (GO:0010556)	2804	66	31.79	+	2.08	2.31e-05
regulation of biosynthetic process (GO:0009889)	2939	69	33.32	+	2.07	9.63e-06
regulation of cellular biosynthetic process (GO:0031326)	2899	68	32.87	+	2.07	1.39e-05
regulation of gene expression (GO:0010468)	2953	68	33.48	+	2.03	2.98e-05
regulation of nitrogen compound metabolic process (GO:0051171)	3002	69	34.04	+	2.03	2.35e-05
positive regulation of cellular process (GO:0048522)	3485	75	39.51	+	1.9	6.57e-05
regulation of cellular metabolic process (GO:0031323)	4223	90	47.88	+	1.88	1.3e-06
cellular protein metabolic process (GO:0044267)	2582	55	29.27	+	1.88	0.0172
regulation of primary metabolic process (GO:0080090)	4171	88	47.29	+	1.86	4.04e-06
regulation of macromolecule metabolic process (GO:0060255)	4190	88	47.51	+	1.85	5.12e-06
positive regulation of biological process (GO:0048518)	3835	80	43.48	+	1.84	6.7e-05
regulation of metabolic process (GO:0019222)	4440	92	50.34	+	1.83	3.27e-06
negative regulation of biological process (GO:0048519)	3254	67	36.89	+	1.82	0.00307
negative regulation of cellular process (GO:0048523)	3035	62	34.41	+	1.8	0.0128
cellular macromolecule metabolic process (GO:0044260)	4167	81	47.25	+	1.71	0.00123
single-multicellular organism process (GO:0044707)	3548	68	40.23	+	1.69	0.0322
Unclassified (UNCLASSIFIED)	5104	44	57.87	-	0.76	0
G-protein coupled receptor signaling pathway (GO:0007186)	1548	2	17.55	-	< 0.2	0.0157
